1 **Novel strand exchange activity of the human PALB2 DNA Binding**  
2 **Domain and its critical role for DNA repair in cells.**

3 Jaigeeth Deveryshetty<sup>1</sup>, Mikhail Ryzhikov<sup>1&</sup>, Nadine Brahiti<sup>2</sup>, Thibaut Peterlini<sup>2</sup>, Graham Dellaire<sup>3</sup>,  
4 Jean-Yves Masson<sup>2</sup> and Sergey Korolev<sup>1,\*</sup>

5 <sup>1</sup> Edward A. Doisy Department of Biochemistry and Molecular Biology, Saint Louis University School  
6 of Medicine, St. Louis, MO 63104, USA

7 <sup>2</sup> Genome Stability Laboratory, CHU de Québec Research Center, HDQ Pavilion, Oncology Axis, 9  
8 McMahon, Québec City, QC G1R 2J6, Canada

9 <sup>3</sup> Department of Pathology, Dalhousie University, Halifax Nova Scotia, Canada

10

11 \* To whom correspondence should be addressed. Tel: (314) 977-9261; Fax: (314) 977-9261; Email:  
12 [sergey.korolev@health.slu.edu](mailto:sergey.korolev@health.slu.edu)

13 & Current address: John T. Milliken Department of Medicine, Division of Pulmonology and Critical  
14 Care Medicine, Washington University School of Medicine, Saint Louis, MO 63105, USA.

15

16

17 **ABSTRACT**

18 Breast cancer associated proteins 1 and 2 (BRCA1, -2) and partner and localizer of BRCA2 (PALB2)  
19 protein are tumor suppressors linked to a spectrum of malignancies, including breast cancer and  
20 Fanconi anemia. They stimulate RAD51 recombinase during homology-directed repair (HDR). Along  
21 with being a hub for a protein interaction network, PALB2 interacts with DNA. The mechanism of  
22 PALB2 DNA binding and its function are poorly understood. We identified a major DNA-binding site  
23 in PALB2, mutation of which reduces the RAD51 foci formation and the overall HDR efficiency in cells  
24 by 50%. PALB2 N-terminal DNA-binding domain (N-DBD) stimulates the RAD51 strand exchange  
25 reaction. Surprisingly, it promotes the strand exchange without RAD51. Moreover, N-DBD stimulates  
26 the inverse strand exchange and can use both DNA and RNA substrates. Our data reveal a versatile  
27 DNA interaction property of PALB2 and demonstrate a critical role of PALB2 DNA binding for  
28 chromosome repair in cells.

29

30

31

32

33

## 34 INTRODUCTION

35 Breast cancer associated proteins 1 and 2 (BRCA1, -2) regulate an efficient non-mutagenic  
36 pathway of chromosome break repair and are described as guardians of chromosomal integrity  
37 (Venkitaraman, 2014). They initiate RAD51-mediated homologous recombination (HR) (Davies et al.,  
38 2001; Moynahan et al., 2001; Sharan et al., 1997; Venkitaraman, 2000) and facilitate restart of stalled  
39 replication (Badie et al., 2010; Lomonosov et al., 2003; Schlacher et al., 2011). The partner and  
40 localizer of BRCA2 (PALB2) protein was discovered as a protein forming a complex with BRCA2 and  
41 regulating BRCA2 activity (Xia et al., 2006). Similarly, to BRCA proteins, PALB2 is an essential  
42 mammalian protein linked to a similar spectrum of cancers and Fanconi anemia (Pauty et al., 2014;  
43 Xia et al., 2007). PALB2 C-terminal WD40 domain interacts with BRCA2 (Oliver et al., 2009; Xia et  
44 al., 2006) while the N-terminus forms a complex with BRCA1 (Zhang et al., 2009a; Zhang et al.,  
45 2009b). The latter localizes at double stranded DNA break (DSB) sites at earlier stage of repair,  
46 inhibiting an alternative pathway of non-homologous end joining and initiating homology-directed  
47 repair (HDR) through interactions with PALB2/BRCA2/RAD51 (Prakash et al., 2015).

48 PALB2 is often described as the hub for a network of tumor suppressors involved in DNA repair  
49 (Park et al., 2014b; Sy et al., 2009b). In addition to BRCA1 and -2 interactions, it contains a chromatin-  
50 association motif (ChAM) in its central region, responsible for PALB2 association with chromatin  
51 through the nucleosome core histones H3 and H2B (Bleuyard et al., 2012). It interacts with MRG15  
52 protein, a component of histone acetyltransferase-deacetylase complexes (Hayakawa et al., 2010;  
53 Sy et al., 2009a); with RAD51 itself and with its paralogs RAD51C, RAD51AP1 and XRCC3 (Dray et  
54 al., 2010; Park et al., 2014a); with translesion polymerase  $\eta$  during recombination-associated DNA  
55 synthesis (Buisson et al., 2014); with KEAP1, an oxidative stress response protein (Ma et al., 2012);  
56 and with RNF168 ubiquitin ligase (Luijsterburg et al., 2017). PALB2 is ubiquitylated in G1 phase of  
57 the cell cycle by KEAP1 and CUL3, leading to its degradation, and, thereby, restraining its activity in  
58 S/G2 (Orthwein et al., 2015).

59 PALB2 promotes assembly of RAD51-ssDNA presynaptic nucleofilaments and formation of D-  
60 loop even in the absence of BRCA2 (Buisson et al., 2010; Dray et al., 2010). PALB2 recruits  
61 Pol $\eta$  polymerase to DSB sites and stimulates a recombination-associated DNA synthesis by Pol $\eta$   
62 (Buisson et al., 2014).

63 BRCA1, -2 and PALB2 proteins also contain DNA binding domains (DBDs) (Buisson et al., 2010;  
64 Dray et al., 2010; Paull et al., 2001; Pellegrini et al., 2002). The functional role of DBDs in these  
65 proteins is poorly understood. Majority of missense mutations in the BRCA2 DBD are pathogenic  
66 (Guidugli et al., 2013; Wu et al., 2005). Disruption of BRCA2 DNA binding leads to HDR reduction  
67 with a BRCA2 construct lacking the PALB2-binding motif (Siaud et al., 2011). Recently, studies of

68 BRCA1/BARD1 complex interaction with DNA and RAD51 led to the discovery of the BRCA1/BARD1  
69 role in RAD51-mediated strand invasion and D-loop formation (Zhao et al., 2017). Two DBDs were  
70 previously identified in PALB2 (Buisson et al., 2010; Dray et al., 2010). The functional role of these  
71 domains remains unknown. PALB2 construct lacking 500 amino acids between the BRCA1 and  
72 BRCA2 binding motifs does not support BRCA2 and RAD51 foci formation in cells during DNA  
73 damage (Sy et al., 2009b). Since both the BRCA1-binding N-terminal and the BRCA2-interacting  
74 WD40 C-terminal domains were retained in this mutant, the results points to the potential importance  
75 of DBDs in PALB2 function.

76 In the current study, we identified a major DBD of PALB2 (N-DBD) and specific amino acids  
77 involved in DNA binding. Mutations of four amino acids significantly reduce RAD51 foci formation and  
78 the efficiency of HDR in a model cell system. Surprisingly, we found that N-DBD supports both forward  
79 and inverse strand exchange even in the absence of RAD51 and can use RNA as a substrate.  
80 Altogether, our data reveal a novel activity of PALB2 and highlight the importance of PALB2 DNA  
81 binding in chromosome maintenance in cells.

## 82 RESULTS

### 83 The DNA-binding mechanism of PALB2 and its function in DNA repair.

84 The major DNA-binding site of PALB2 is localized in the N-terminal domain (N-DBD). Two truncation  
85 fragments of PALB2 were previously reported to interact with DNA, T1 (residues 1-200) and T3  
86 (residues 372-561)(Buisson et al., 2010). Both fragments together with the fragment consisting of  
87 amino acids 1-573 (PB2-573 in text), which includes both the T1 and T3, were cloned and purified  
88 (Fig. S1).

89 **Figure S1.** SDS PAGE analysis of purified proteins used in this study: **A)** T1 and T1 146AAAA mutant,  
90 **B)** T3, **C)** PB2-573 and PB2-573 146AAAA, and **D)** RAD51.

91 Quantitative measurement of PALB2 interaction with ss- and dsDNA oligonucleotides of different  
92 lengths demonstrate that T1 fragment alone interacts with all tested substrates with almost  
93 indistinguishable affinity from that of PB2-573 (Fig. 1). The T3 fragment has significantly lower affinity  
94 for DNA by itself. The  $K_d$  of the T1 and PB2-573 fragments were similar with both ss- and dsDNA  
95 substrates. The only difference was observed at an elevated salt concentration of 250 mM NaCl,  
96 where the PB2-573 fragment retained partial DNA binding activity (Fig. S2). In both cases, interactions  
97 were inhibited by addition of 500 mM NaCl. The T1 fragment will be referred as N-DBD in the text  
98 below. Interestingly, N-DBD binds long ssDNA substrates (49 nt) with significantly higher affinity than  
99 short ones (20 nt). This suggests an interaction with ssDNA through multiple binding sites, potentially  
100 formed by the previously described PALB2 oligomerization (Buisson and Masson, 2012; Sy et al.,

101 2009c) or through interaction with multiple binding sites within a monomer (see below). Interaction  
 102 with dsDNA was length-independent, suggesting that more rigid dsDNA interacts with a single site.

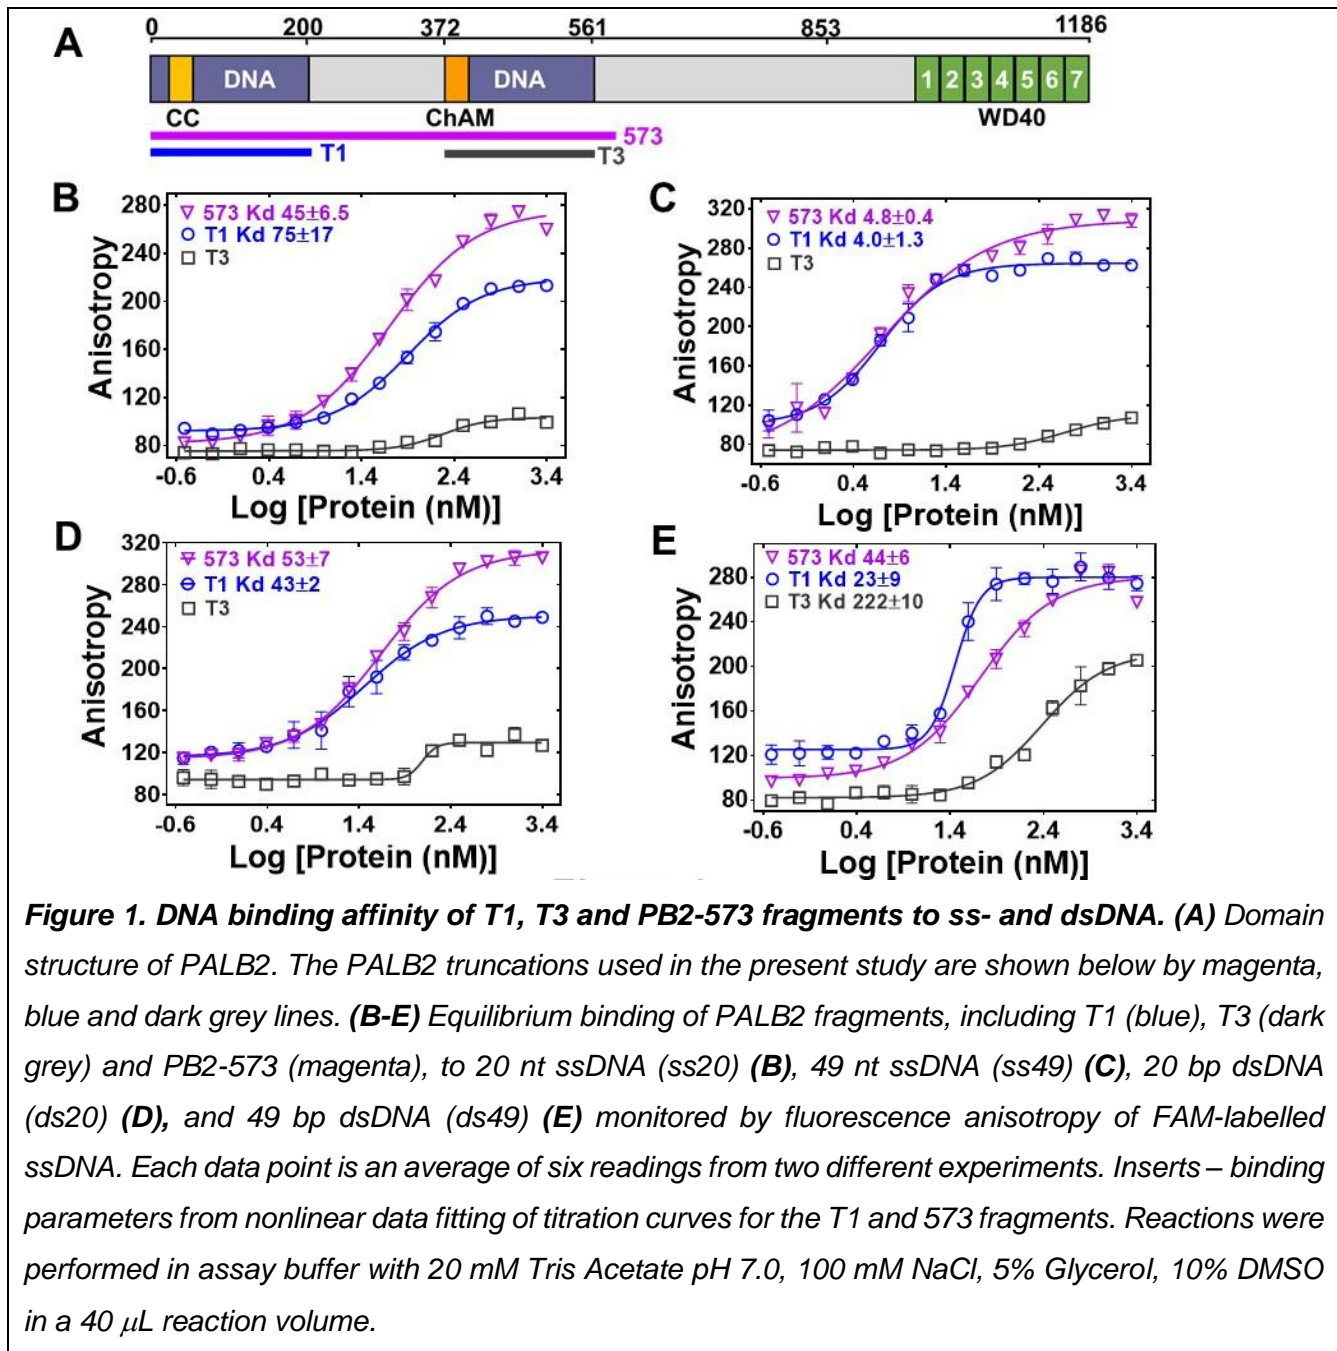

103  
 104  
 105  
 106  
 107  
 108  
 109  
 110  
 111  
 112

113 **Figure S2. Effect of increasing salt concentration on PALB2 fragments binding to DNA.** A)  
 114 Equilibrium binding of T1 with FAM-ss49, B) equilibrium binding of PB2-573. Each data point is an  
 115 average of six readings from two different experiments.

116 Identification of DNA-binding residues. Since the PALB2 DNA binding is salt dependent, we  
 117 performed alanine scanning mutagenesis of several clusters of positively charged amino acids to  
 118 identify the DNA binding site in the N-DBD (Fig. S3).

119 **Figure S3.** Amino acid sequence alignment of PALB2 T1 from different organisms with residues color-  
120 coded accordingly to polarity, with mutated residues identified by red boxes, and with the secondary  
121 structure elements depicted at the bottom of alignment in cartoon representation as predicted by  
122 Phyre server. Following sequences were used in the analysis. gi|21757330 – *Homo sapiens*,  
123 gi|1297718444 - *Ptilocolobus tephrosceles*, gi|724966540 - *Rhinopithecus roxellana*, gi|967502006 -  
124 *Macaca mulatta*, gi|1060946151 - *Callithrix jacchus*, gi|1328794872 - *Loxodonta africana*, gi|  
125 1244140196 - *Enhydra lutris kenyoni*, gi|821391924 - *Orcinus orca*, gi|1111220295 - *Panthera pardus*,  
126 gi|664756985 - *Equus przewalskii*, gi|124486979 - *Mus musculus*.

127 The main DNA-binding cluster is formed by amino-acids R146, R147, K148, and K149. Alanine  
128 mutation of these residues reduced binding affinity by two orders of magnitude with a  $K_d$  change from  
129  $4.0 \pm 1.3$  nM to  $316 \pm 59$  nM in the case of T1 and from  $4.8 \pm 0.4$  nM to  $167 \pm 50$  nM in the case of PB2-  
130 573 (Fig. 2). DNA binding was moderately affected by mutations of two other clusters, including  
131 K45A/K50A, for which the  $K_d$  was increased to  $28 \pm 5.2$  nM (Fig. S4), and the triple mutant  
132 R170A/K174A/R175A with similar change in  $K_d$ . From these experiments, we concluded that the main  
133 DNA binding site is formed by residues 146-149 with a potential minor contribution from other basic  
134 amino acids of the N-DBD.

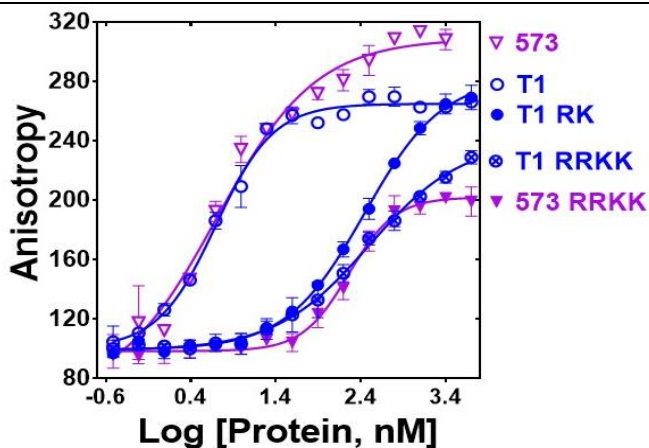

135  
136 **Figure 2. Mutation of DNA binding residues.** Isotherm of fluorescence anisotropy of FAM-ss49 (5  
137 nM) titrated by PALB2 T1 (blue, open circles) and PB2-573 (magenta, open triangles) fragments and  
138 their mutants: T1 146-RK/AA (filled blue circles), T1 146-RRKK/AAAA (crossed open blue circles),  
139 and 573 146-RRKK/AAAA (filled magenta triangles) under conditions identical to those in Fig. 1.

140 **Figure S4. DNA binding of T1 mutants.** Equilibrium binding of 5 nm FAM-ss25 (A,C) or FAM-ss49  
141 (B,D) to PALB2 T1 (blue). In A) and B) isotherm for K45A is in green, for K50A in red, for K45A/K50A  
142 in black. In C) and D) isotherm for R170A is in red, for K174A in green, for R170A/K174A in magenta,  
143 for R170A/R175A in orange, and for R170A/K174A/R175A in black. The binding buffer is 20 mM Tris-  
144 acetate pH 7.0, 100 mM NaCl, 5% glycerol, 10% DMSO.

145 Impairment of DNA repair in cells with the PALB2 DNA-binding mutant. The mutations described  
 146 above were used to separate the DNA-binding function from other macromolecular interactions of  
 147 PALB2 during DNA repair in HeLa cell. Positively charged residues 146-149 were mutated to alanines  
 148 in the full length PALB2 protein and the effect of these mutations was measured in two assays. First,  
 149 we evaluated RAD51 foci formation in cells after gamma irradiation (Fig. 3A). Endogenous PALB2  
 150 was depleted by siRNA and cells were transformed with either wild type PALB2 or the DNA-binding  
 151 mutant (Fig. 3A, bottom panel). PALB2 depletion leads to a severe defect in RAD51 foci formation.  
 152 WT PALB2 restores RAD51 foci formation, while the DNA-binding PALB2 mutant restores only ~ 50%  
 153 of RAD51 foci formation. Therefore, mutagenesis of only four positively charged residues in PALB2  
 154 has a major effect on efficiency of RAD51 recruitment to DNA damage sites.

155

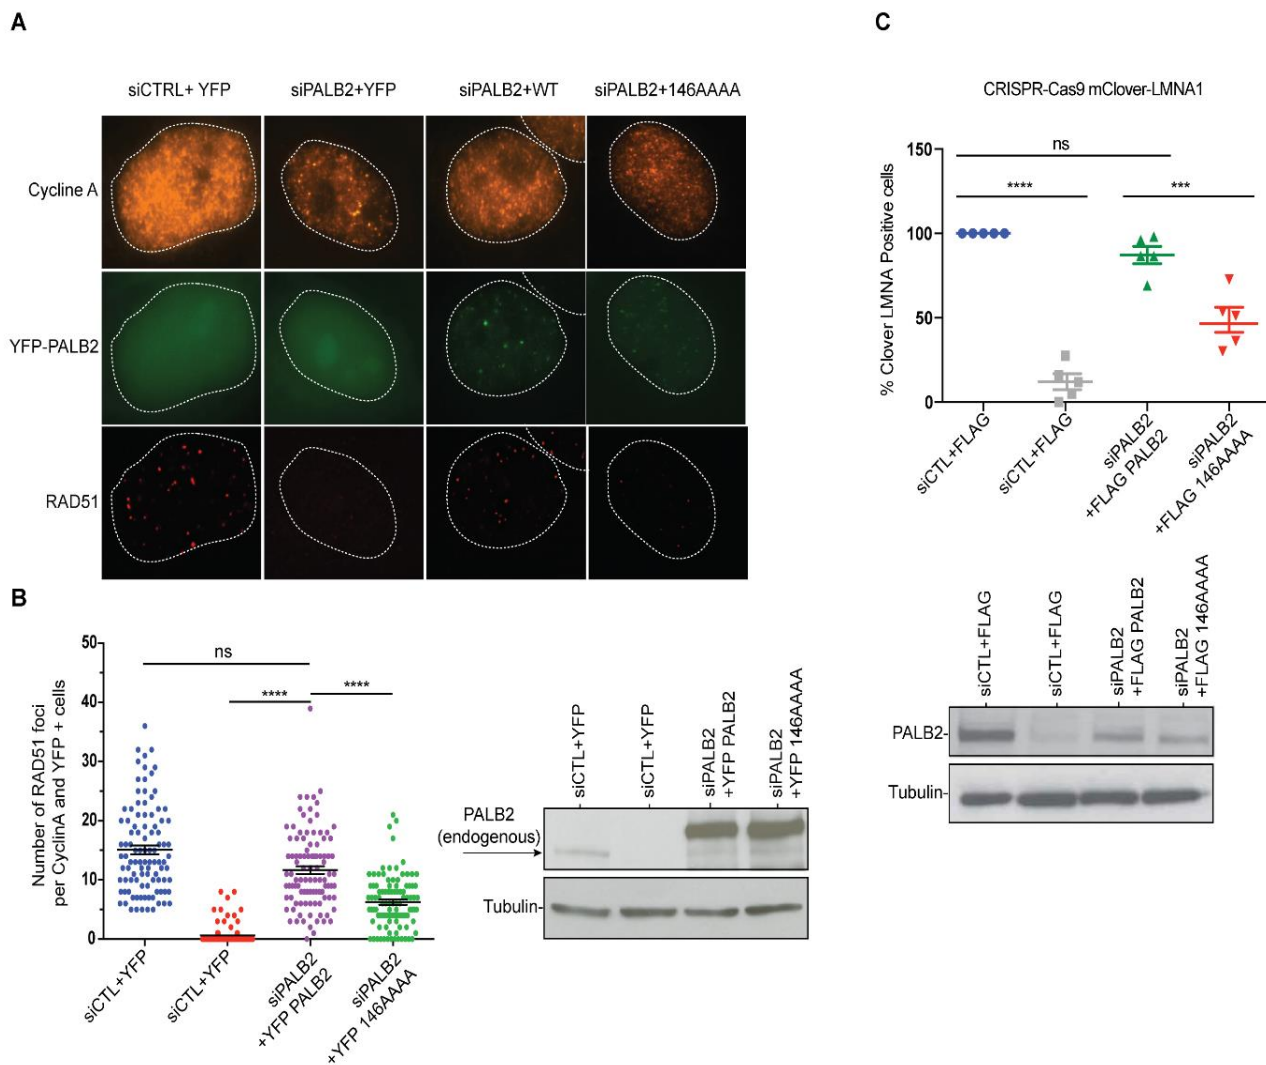

156

157 **Figure 3. Effect of a PALB2 DNA-binding mutation on homologous recombination. A)**

158 **Representative immunofluorescence images of RAD51 foci in PALB2 knockdown HeLa cells**

159 *complemented with the indicated YFP construct and synchronized in S/G2 by double thymidine block,*  
160 *as determined by cyclin A staining. B) Left: RAD51 foci quantification in control siRNA (blue), siPALB2*  
161 *(red) and with siPALB2 with subsequent complementation by siRNA resistant constructs YFP-PALB2*  
162 *(magenta) and 146AAA DNA-binding mutant PALB2 (green). Right: Western blotting of the samples*  
163 *shown in B to monitor knockdown and complementation efficiency. C) Top: Gene-targeting efficiency*  
164 *of siRNA PALB2 cells complemented with wild-type and 146AAA siRNA resistant constructs mClover*  
165 *positive/iRFP cells were quantified. Bottom: Western blotting of the samples shown in C) to monitor*  
166 *knockdown and complementation efficiency. \*\*\*P<0.01 and \*\*\*\*P<0.001. (Fig S5B).*

167 Similarly, we tested the role of PALB2 interaction with DNA for the efficiency of HDR in U2OS  
168 cells using a novel LMNA-Clover based assay, where DNA breaks at a specific gene are introduced  
169 by the CRISPR system (Fig. S5) (Buisson et al., 2017b). As in case of RAD51 foci formation,  
170 complementation of PALB2-depleted cells with the DNA-binding PALB2 mutant restores only 50% of  
171 HDR efficiency, in contrast to WT PALB2, which restores more than 90% of activity (Fig. 3B).  
172 Altogether, these studies show that PALB2 DNA binding plays a significant role in HR and DNA repair  
173 *in vivo.*

174 **Figure S5.** *Representative images and schematic representation of CRISPR Cas9/mClover-LMNA1*  
175 *mediated HR assay. Following nucleofection, Cas9 creates a double-strand break in the LMNA locus*  
176 *leading to integration of the mClover gene by homologous recombination. Clover-labeled Lamin A/C*  
177 *proteins exhibit green fluorescence enriched at the nuclear periphery, which is indicative of the*  
178 *successful gene targeting by homologous recombination.*

## 179 **PALB2 promotes DNA and RNA strand exchange.**

180 *PALB2 stimulates RAD51-mediated strand exchange and promotes a similar reaction without RAD51.*

181 PALB2 stimulates RAD51 filament formation even in the absence of BRCA2 (Buisson et al., 2010).  
182 Here, we investigated the ability of the PALB2 N-DBD to stimulate the strand exchange activity of  
183 RAD51 using a fluorescence-based strand exchange assay similar to the one previously published  
184 (Fig. 4A) (Jensen et al., 2010; Ryzhikov et al., 2014). Under solution conditions used in DNA-binding  
185 assays in Fig. 1 and even with reduced NaCl concentration, RAD51 displayed a low activity, in  
186 contrast to *E. coli* RecA (Fig. 4B, C).

187 RAD51 activity was stimulated by addition of 5 mM CaCl<sub>2</sub> (Fig. S6). Recombination mediator proteins  
188 (RMPs) stimulate recombinase activity even at unfavourable solution conditions, such as in the case  
189 of Rad52 (Krejci et al., 2002; New et al., 1998), BRCA2 (Jensen et al., 2010)(Liu et al., 2010;  
190 Thorslund et al., 2010) and the Hop2-Mnd1 complex (Chi et al., 2007). Similar to the previously  
191 published finding that the full length PALB2 stimulates RAD51 function (Buisson et al., 2010; Dray et

192 al., 2010), we found that the PALB2 N-DBD alone stimulates RAD51-mediated strand exchange (Fig.  
193 4).

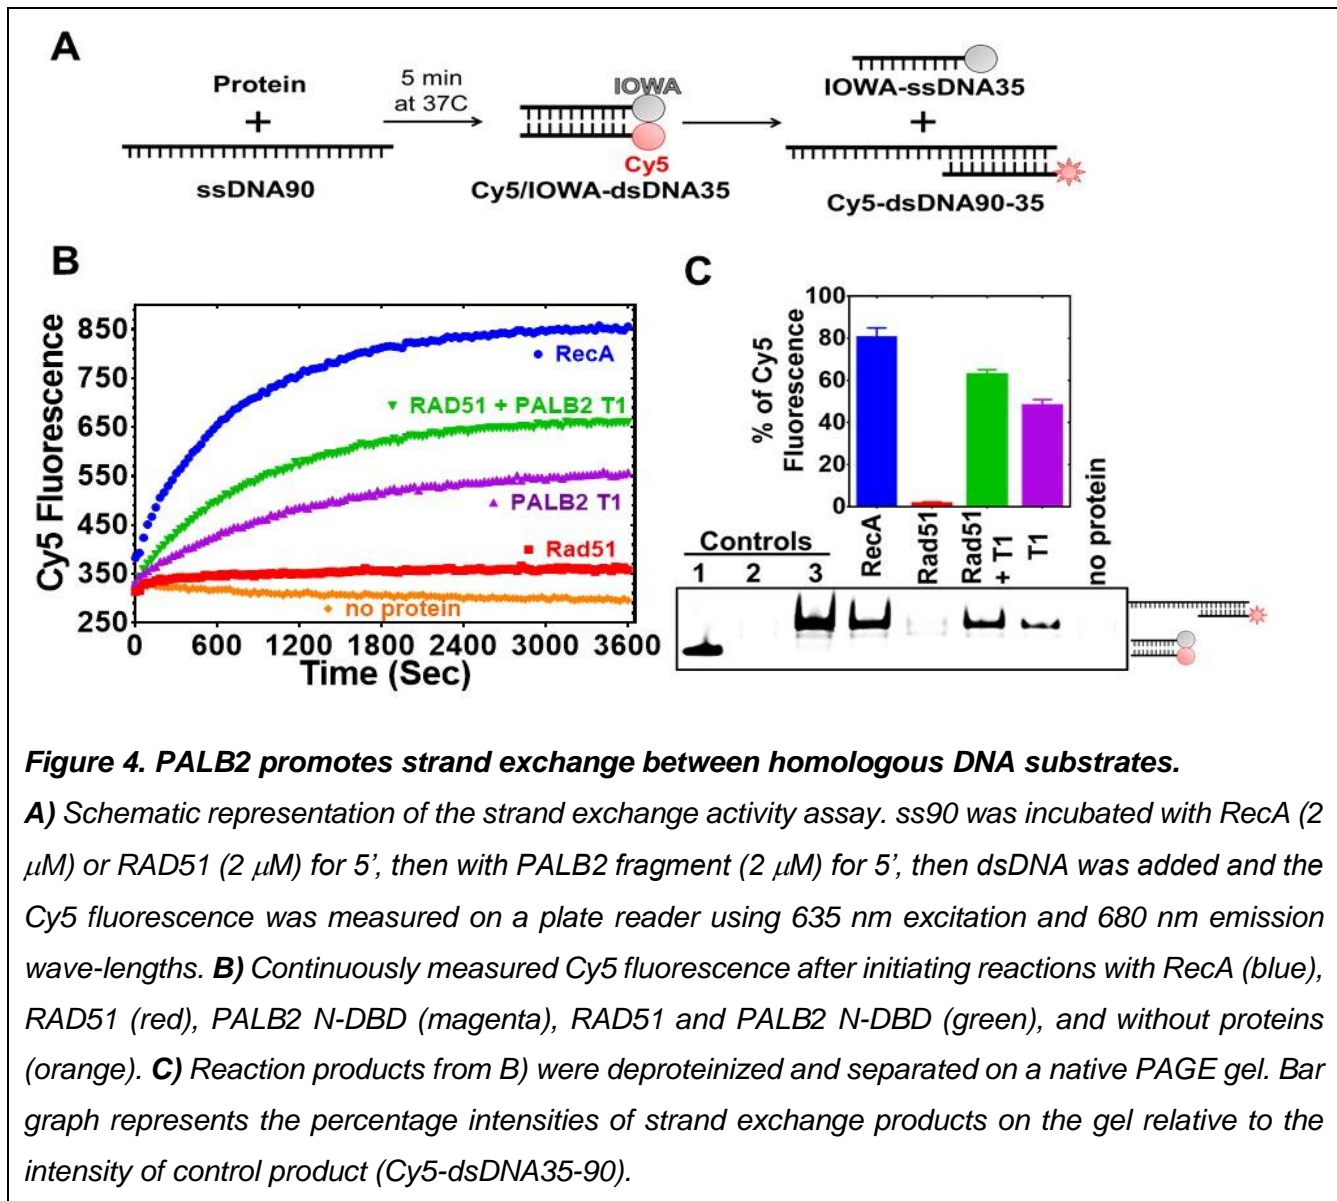

194

195 **Figure 4. PALB2 promotes strand exchange between homologous DNA substrates.**

196 **A)** Schematic representation of the strand exchange activity assay. ss90 was incubated with RecA (2  
197  $\mu$ M) or RAD51 (2  $\mu$ M) for 5', then with PALB2 fragment (2  $\mu$ M) for 5', then dsDNA was added and the  
198 Cy5 fluorescence was measured on a plate reader using 635 nm excitation and 680 nm emission  
199 wave-lengths. **B)** Continuously measured Cy5 fluorescence after initiating reactions with RecA (blue),  
200 RAD51 (red), PALB2 N-DBD (magenta), RAD51 and PALB2 N-DBD (green), and without proteins  
201 (orange). **C)** Reaction products from B) were deproteinized and separated on a native PAGE gel. Bar  
202 graph represents the percentage intensities of strand exchange products on the gel relative to the  
203 intensity of control product (Cy5-dsDNA35-90).

204 **Figure S6. A)** Strand exchange by RAD51 monitored by Cy5 fluorescence under optimized conditions  
205 with 5 mM CaCl<sub>2</sub>, 5 mM MgCl<sub>2</sub>. **B)** End products of the reaction in A) analyzed with EMSA.

206 Surprisingly, the N-DBD promotes strand exchange at a comparable rate even without RAD51.  
207 Reaction products were further analysed by EMSA gel shift to rule out any artefact of protein-specific  
208 fluorophore quenching (Fig. 4C). The results were confirmed using DNA with different fluorescent  
209 labels (Fig. S7). The strand exchange activity of N-DBD was even more efficient with longer dsDNA  
210 substrate (Fig. S8).

211 **Figure S7. EMSA of N-DBD-mediated strand exchange products using Cy3- and Cy5-labeled ds35**  
212 **DNA.**



213 **Figure S8.** Forward (A) and inverse (B) strand exchange reactions supported by N-DBD at different  
 214 concentrations ranging from 0.25 mM to 3 mM performed with ss90 and FAM/Dadsyl-labelled ds49.

215 Since N-DBD stimulates a similar reaction on its own, it is unclear whether the N-DBD fragment  
 216 stimulates RAD51 activity or if the two proteins function independently. In a limited titration experiment  
 217 shown in Figure 5, the efficiency of the strand exchange increases proportionally to N-DBD  
 218 concentration in the absence of RAD51. However, in the presence of 2  $\mu$ M of RAD51, the maximum  
 219 rate of strand exchange is reached at 1  $\mu$ M of N-DBD. These data suggest a synergistic effect of two  
 220 proteins in a strand exchange reaction.

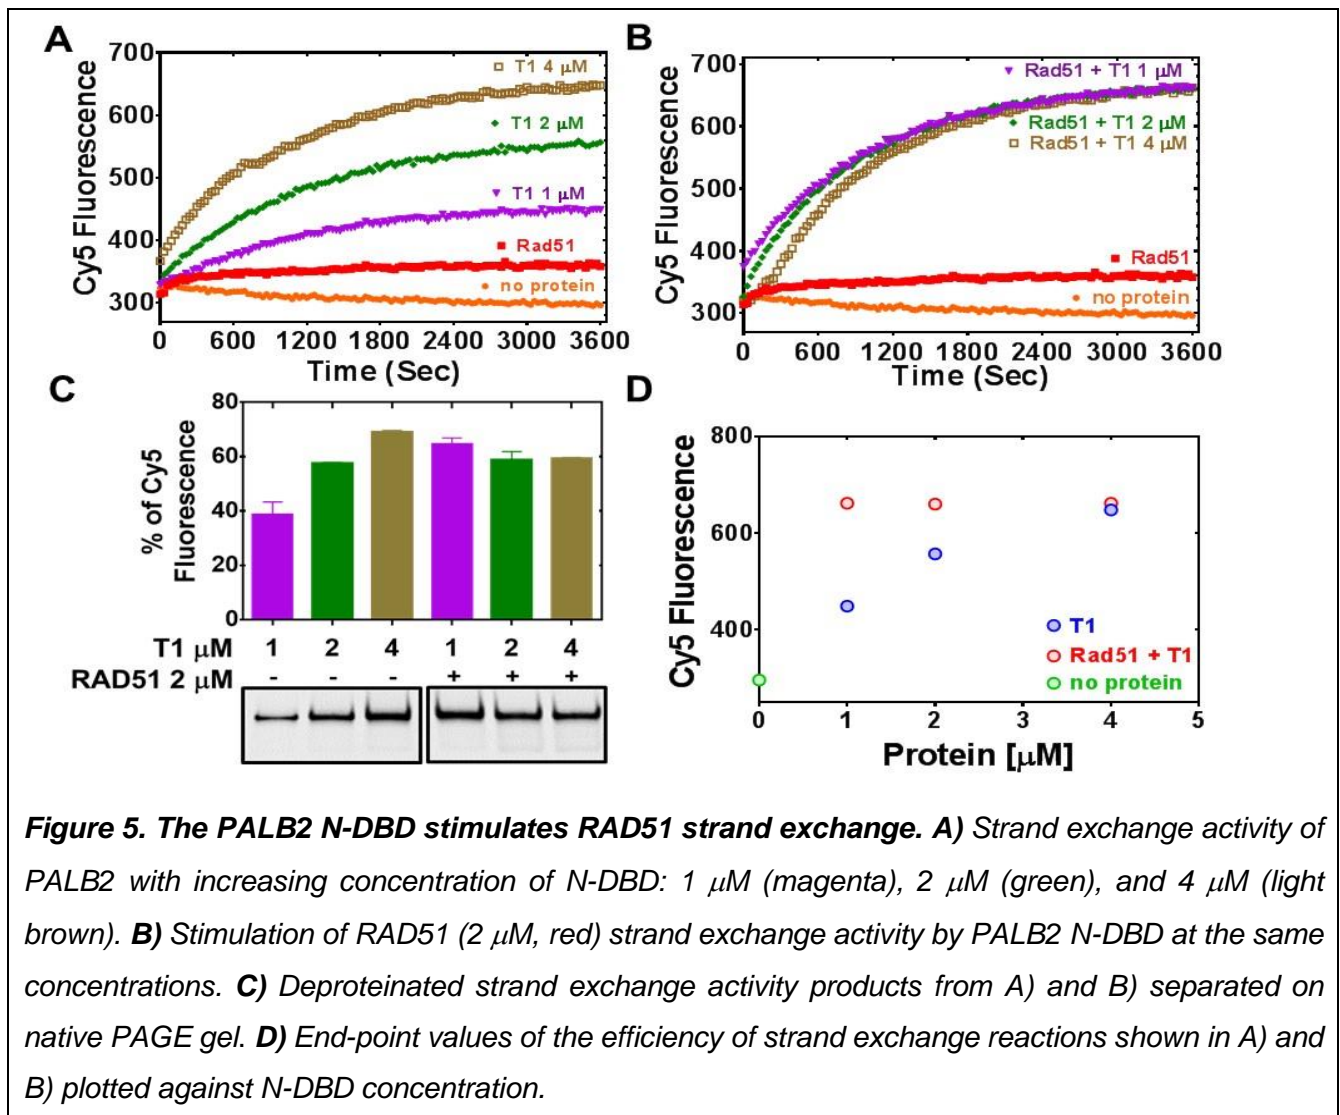

228 Additional evidence of synergism between the two proteins comes from conformational changes  
 229 of ssDNA labelled with a Cy3 at 5' and Cy5 at 3' ends (Cy3-dT<sub>70</sub>-Cy5) (Figs. 6, S9). PALB2 N-DBD  
 230 supports a compact conformation with a high FRET, as in the cases of RAD52 (Grimme et al., 2010)  
 231 and SSB (Roy et al., 2007). RAD51 binds ssDNA in an extended confirmation with a low FRET. Both  
 232 proteins support an intermediate FRET value that remains constant even with changed molar ratio of

233 two proteins in solution. The conformation became more extended upon addition of ATP in the case  
234 of RAD51 and of RAD51 with N-DBD (Fig. S9). Addition of excess N-DBD does not increase FRET,  
235 suggesting that RAD51 and N-DBD form a stronger complex with ssDNA than N-DBD alone. Both  
236 experiments together (Figs. 5, 6, S9) strongly support formation of a complex between PALB2 N-DBD  
237 and RAD51 on ssDNA and synergism during the presynaptic filament formation and the strand  
238 exchange.

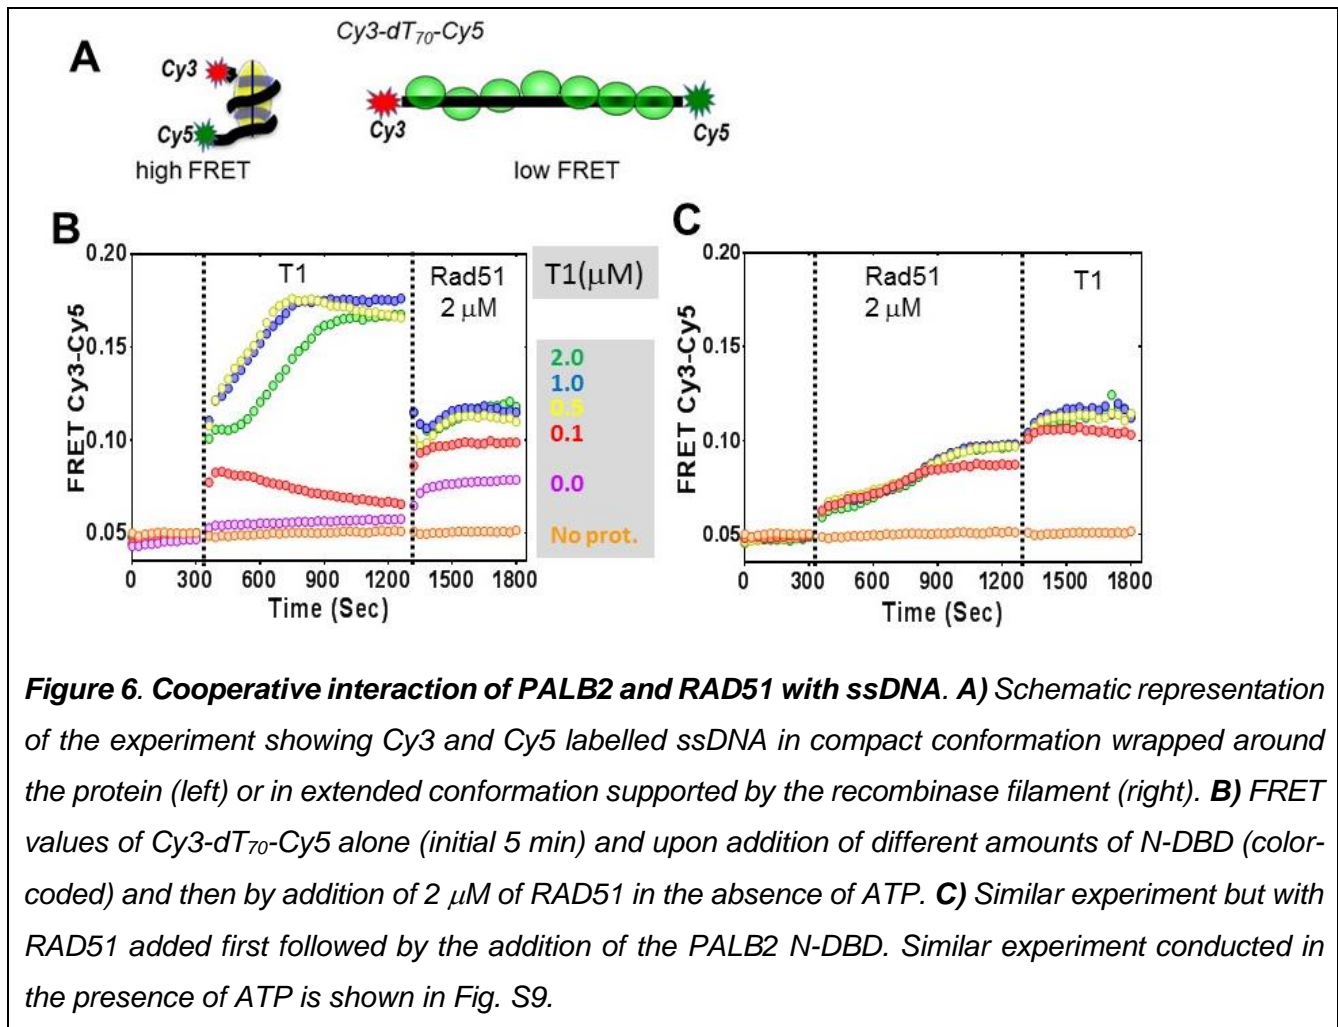

239

240 **Figure 6. Cooperative interaction of PALB2 and RAD51 with ssDNA.** **A)** Schematic representation  
241 of the experiment showing Cy3 and Cy5 labelled ssDNA in compact conformation wrapped around  
242 the protein (left) or in extended conformation supported by the recombinase filament (right). **B)**  
243 FRET values of Cy3-dT<sub>70</sub>-Cy5 alone (initial 5 min) and upon addition of different amounts of N-DBD (color-  
244 coded) and then by addition of 2 μM of RAD51 in the absence of ATP. **C)** Similar experiment but with  
245 RAD51 added first followed by the addition of the PALB2 N-DBD. Similar experiment conducted in  
246 the presence of ATP is shown in Fig. S9.

247 **Figure S9. Interaction of PALB2 and RAD51 with ssDNA.** **A)** FRET of Cy3-dT<sub>70</sub>-Cy5 alone (initial  
248 5 min) is changed upon addition of different amounts of N-DBD (color-coded) and then by addition of  
249 2 μM of RAD51 in the absence of ATP. FRET decreases further on addition of 2 mM ATP. **B)** A  
250 Similar experiment but with RAD51 added first followed by the addition of PALB2 N-DBD.

251 PALB2 stimulates an inverse strand exchange and can use an RNA substrate. RecA and Rad52  
252 support an inverse strand exchange as well as an R-loop formation (Kasahara et al., 2000; Mazina et  
253 al., 2017; Zaitsev and Kowalczykowski, 2000). We tested the PALB2 N-DBD for similar activities. The  
254 PALB2 N-DBD supported both forward and inverse strand exchange with similar efficiencies (Fig. 7B,

255 E). Furthermore, PALB2 supported both reactions with a ssRNA substrate (Figs. 7C, F). DNA-binding  
 256 mutant fragment (146AAAA) did not support strand exchange on its own and in the presence of  
 257 RAD51 (Fig. S10). RAD52 was shown to have different efficiency of forward and inverse reactions  
 258 with relatively low forward and a more efficient inverse reactions (Mazina et al., 2017). We did not  
 259 observe this difference with PALB2. The inverse strand exchange was slower than in case of RAD52  
 260 and comparable to that of RAD51 under optimal conditions.

261 **Figure S10. PALB2 DNA binding site mutants do not support strand exchange. A)** Forward  
 262 strand exchange activity of PALB2 N-DBD DNA binding mutants. **B)** The strand exchange of PALB2  
 263 N-DBD mutants in the presence of Rad51. Strand exchange reactions were performed with Cy5 and  
 264 Iowa labelled 35bp DNA at 2  $\mu$ M protein concentration.

265

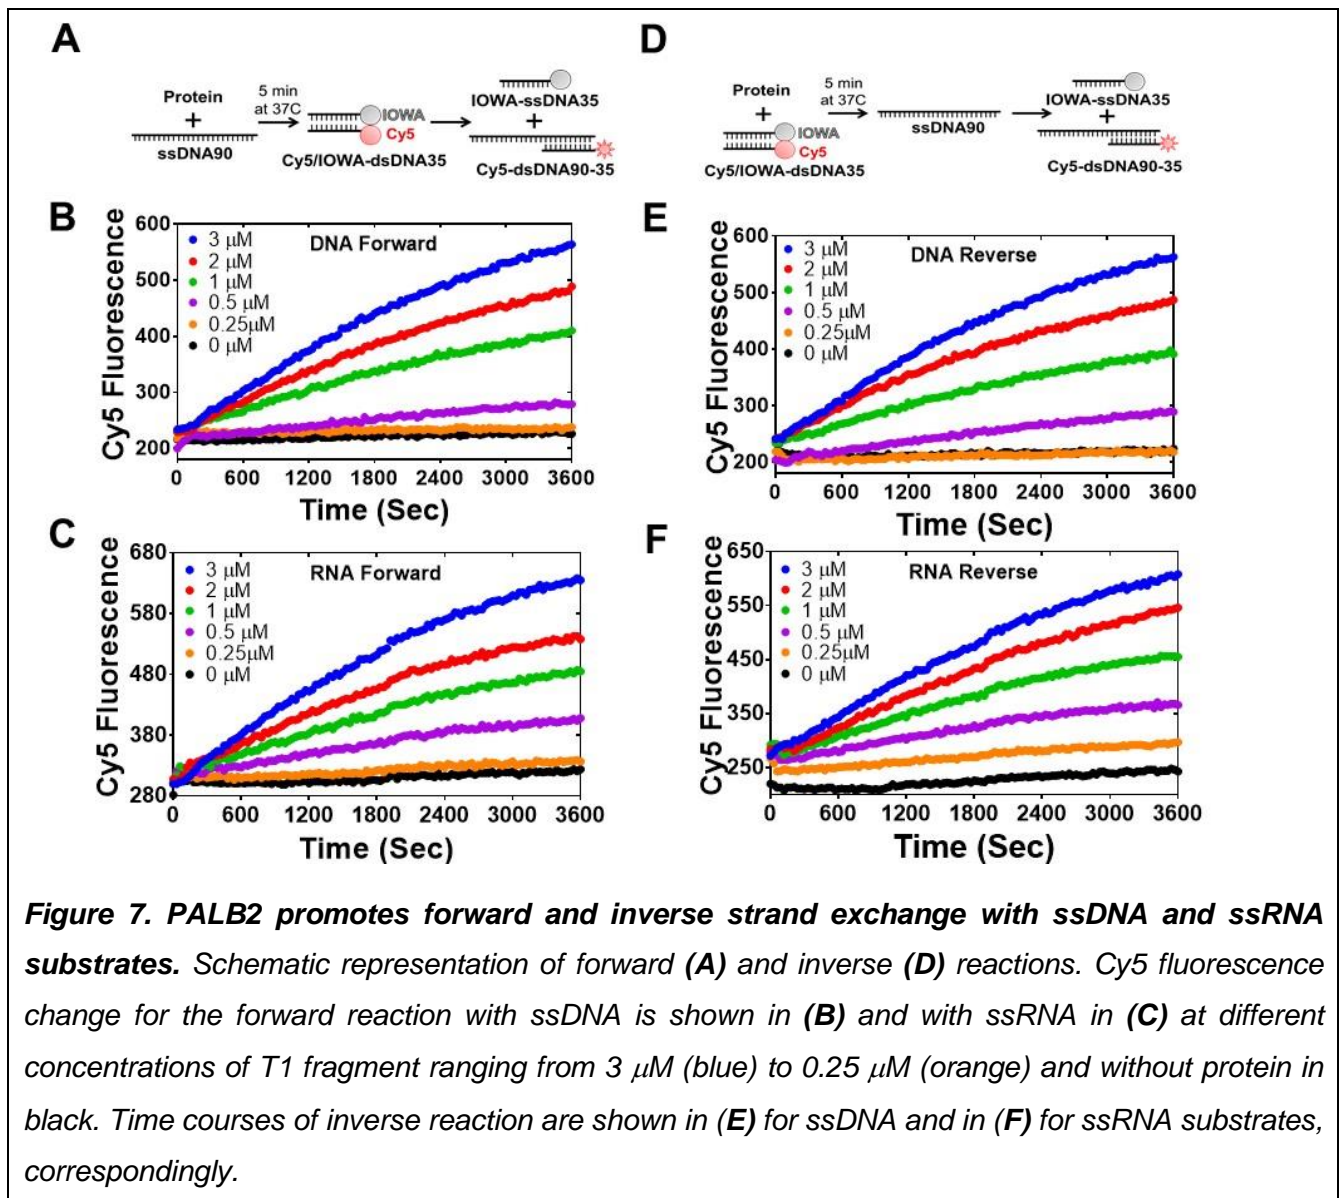

273 *Mechanism of the PALB2 stimulated strand exchange.* To rule out a potential effect of DNA melting  
274 by PALB2, which may lead to nonspecific reannealing of a separated strands with complementary  
275 ssDNA in solution, the N-DBD was incubated with dsDNA without ssDNA (Fig. S11). The N-DBD does  
276 not melt dsDNA as there was no change in fluorescence of Cy5/lowa-ds35 upon incubation with the  
277 protein, while the addition of complimentary ssDNA triggers the reaction. Moreover, the N-DBD  
278 stimulates annealing of complimentary ssDNA (Fig. S12). Therefore, the observed strand exchange  
279 is is not a consequence of a nonspecific dsDNA melting by the protein.

280 **Figure S11. PALB2 does not unwind dsDNA.** *Cy5/lowa ds35 DNA was incubated with three*  
281 *different concentrations of N-DBD for 30' before adding complementary ss90 DNA.*

282 **Figure S12. PALB2 anneals complimentary ssDNA.** *Annealing of Cy5- and lowa-labeled*  
283 *complimentary ss35 strands in the presence of different concentrations of PALB2 N-DBD.*

284 Both RecA and RAD52 proteins, which support strand exchange, simultaneously interact with ds-  
285 and ssDNA through distinct binding sites located next to each other (Arai et al., 2011; Chen et al.,  
286 2008; Honda et al., 2011; Kagawa et al., 2002; Mazin and Kowalczykowski, 1998; Seong et al., 2008).  
287 PALB2 also interacts with both ss- and dsDNA (Fig. 1 and Buisson et al., 2010; Dray et al., 2010),  
288 although the structure and the molecular details of PALB2 interaction with DNA remains unknown. To  
289 verify if other proteins characterized by comparable affinities to both ss- and dsDNA also support  
290 strand exchange, we tested prokaryotic RMPs, RecO and RecR. *E. coli* RecO alone stimulates strand  
291 annealing (Kantake et al., 2002; Luisi-DeLuca and Kolodner, 1994) and, in complex with RecR,  
292 stimulates RecA-mediated strand exchange with ssDNA bound to SSB (Ryzhikov et al., 2014; Umezu  
293 et al., 1993; Umezu and Kolodner, 1994). Both RecO and RecOR interact with ss- and dsDNA  
294 (Ryzhikov et al., 2014). However, neither RecO nor RecOR complex promote strand exchange in the  
295 absence of RecA (Fig. S13). Therefore, the simple ability of a protein to interact with ss- and dsDNA  
296 is not enough to promote strand exchange and even RMPs, which stimulate the reaction by RecA  
297 recombinase, do not support it in the absence of recombinase.

298 **Figure S13. RecO and RecOR do not support strand exchange without RecA.** **A)** *Strand*  
299 *exchange activity measured under conditions identical to those in Fig. 4 of RecO (magenta), RecOR*  
300 *(orange) and RecOR in the presence of RecA and SSB (brown) monitored by Cy5 fluorescence.*  
301 *Activity of RecA alone without SSB is shown in green.* **B)** *Reaction products from A) were*  
302 *deproteinized and separated on native PAGE gel.*

## 303 DISCUSSION

304 In this report, we identify major DNA-binding residues of PALB2 and demonstrate their critical  
305 role for the HDR in cells. PALB2 is described as a scaffold protein linking BRCA1 with BRCA2 during  
306 HDR and interacting with many other chromatin proteins. However, the mutant with BRCA1 and

307 BRCA2 binding motifs without the middle portion of the proteins does not support BRCA2 and RAD51  
308 recruitment to DSBs (Sy et al., 2009b). A critical role of PALB2 DNA binding was also suggested by  
309 studies of the BRCA2 mechanism (Siaud et al., 2011), where the “miniBRCA2” construct, which  
310 includes only DBDs with two BRC repeats, was 3-4 times less efficient in the absence of PALB2  
311 interaction. Moreover, interaction with PALB2 alleviates the requirement of BRCA2 DNA binding,  
312 including a deletion of the entire BRCA2 DBD. Here, we demonstrate that mutation of only four DNA-  
313 binding residues of PALB2 reduces both RAD51 foci and overall HDR efficiency by 50%, even in the  
314 presence of endogenous BRCA2. Therefore, PALB2 interaction with DNA is critical for recruitment of  
315 the BRCA2 and RAD51 to DSB sites and efficient DNA repair in cells.

316 Secondly, we demonstrate that PALB2 N-DBD stimulates RAD51-mediated strand exchange *in*  
317 *vitro*. Therefore, PALB2 can cooperate with BRCA2 in loading RAD51 onto DNA and/or promoting  
318 the subsequent steps of D-loop formation and recombination dependent DNA synthesis.

319 The most unexpected finding is the ability of PALB2 to stimulate strand exchange between  
320 homologous ss- and dsDNA fragments in the absence of recombinase. This process is protein specific  
321 and is not a consequence of a simple DNA melting and reannealing of separated strands in solution,  
322 since the PALB2 N-DBD does not unwind the DNA helix and promotes DNA annealing. Proteins  
323 supporting strand exchange, such as RecA and RAD52, share several common features. They  
324 interact with both ss- and dsDNA through distinct sites located next to each other (Arai et al., 2011;  
325 Chen et al., 2008; Honda et al., 2011; Kagawa et al., 2002; Mazin and Kowalczykowski, 1998;  
326 Saotome et al., 2018; Seong et al., 2008), they form oligomeric structures, such as recombinase-DNA  
327 filament (Chen et al., 2008; Egelman and Stasiak, 1986; Yang et al., 2001) or Rad52 ring structure  
328 (Shinohara et al., 1998; Singleton et al., 2002), and they distort the dsDNA helix to initiate strand  
329 exchange with the bound complementary ssDNA. RecA stretches dsDNA (Chen et al., 2008; Leger  
330 et al., 1998), while Rad52 bends the DNA helix bound to the toroidal oligomeric ring (Brouwer et al.,  
331 2017). The PALB2 N-DBD interacts with both ss- and dsDNA. Both N-DBD and the full length PALB2  
332 form oligomeric structures and the oligomerization is partially mediated by the N-terminal coiled-coil  
333 motif (Fig. S14A) and (Buisson and Masson, 2012; Sy et al., 2009c). Titration of ss49 by the N-DBD  
334 suggests a stoichiometry of four or five N-DBD monomers per ss49 (Figs. S14B, C) which fits an  
335 oligomeric state suggested by the size-exclusion chromatography data (Fig. S14A).

336 **Figure S14. Oligomerization and DNA-binding stoichiometry of PALB2 T1. A)** Gel filtration of T1  
337 fragment using Superdex-200 10/300 column (blue isotherm). Magenta isotherm corresponds to SEC  
338 of BioRad MW standards with MW in kDa shown above each peak. The elution volume of N-DBD  
339 correspond to tetrameric or pentameric structure. **B)** and **C)** Titration of FAM-labeled ss49 (at  
340 concentration of 50 nM in B) and 100 nM in C)) by N-DBD revealed a 5:1 protein:DNA stoichiometry.

341 Previously, we demonstrated that PALB2 immobilized on ssDNA beads efficiently pulls down  
342 non-homologous dsDNA (Buisson et al., 2010). It is unclear whether ss- and dsDNA substrates are  
343 bound to same site of different subunits of PALB2 oligomer of two different DNA binding site of the  
344 same monomer. The presence of at least two other minor DNA-binding sites in the N-DBD suggests  
345 such a possibility. Higher affinity towards longer ssDNA and the FRET experiment support a model  
346 of wrapping long flexible ssDNA around an oligomer and binding to multiple sites. In contrast,  
347 interaction with dsDNA is less length dependent. We can speculate that binding of dsDNA to more  
348 than one monomer in PALB2 oligomer can trigger DNA helix distortion. Indeed, bending of dsDNA  
349 was observed upon PALB2 binding to 40 bp dsDNA labelled with a Cy3/Cy5 FRET pair as the  
350 increase of FRET signal (Fig. S15). Thus, PALB2 shares several specific structural and DNA  
351 interaction features with both RecA/RAD51 and Rad52 proteins and supports a protein-specific strand  
352 exchange reaction.

353 **Figure S15. PALB2 N-DBD bends dsDNA.** FRET of Cy3-ds40-Cy5 alone (initial 5 min) is changed  
354 upon addition of different amounts of N-DBD (color-coded). Protein interaction does not significantly  
355 change fluorescence with DNA substrates labelled by either fluorophore alone.

356 It is important to note one distinct feature of the PALB2 N-DBD: the secondary structure prediction  
357 (Fig.S3) suggests a different folding of the N-DBD fragment than that of RecA-like domains or a Rad52.  
358 The latter proteins are formed by  $\alpha/\beta$  sandwich folds, while PALB2 N-DBD folding is predicted to be  
359 composed of only  $\alpha$ -helices, which may form helical bundle-like structure similar to that of Hop2-  
360 Mnd1(Kang et al., 2015). Therefore, PALB2 N-DBD represents a novel structural fold that supports  
361 strand exchange.

362 While the functional significance of this property remains to be investigated, it further supports  
363 the involvement of PALB2 in specific DNA transactions during HDR, similar to the involvement of  
364 BRCA1/BARD1 in D-loop formation (Zhao et al., 2017). It was shown that both PALB2 and BRCA2  
365 stimulate Pol $\eta$  DNA synthesis within a D-loop substrate *in vitro* through the recruitment of the  
366 polymerase to the invading strand in the D-loop (Buisson et al., 2014). Interestingly, DNA synthesis  
367 was more efficient in the presence of PALB2 than BRCA2, while both proteins were shown be equally  
368 efficient in recruiting polymerase to DSB sites. PALB2 strand exchange may contribute to other steps  
369 of HDR such as second-end capture(Mazloum and Holloman, 2009; McIlwraith and West, 2008;  
370 Nimonkar et al., 2009). Interestingly, PALB2 (FANCN) and BRCA2 (FANCD) are involved in  
371 replication-dependant removal of interstrand DNA crosslinks associated with Fanconi anemia  
372 (Howlett et al., 2002; Moldovan and D'Andrea, 2009; Xia et al., 2007). The strand exchange function  
373 of PALB2 may be also important for alternative DNA repair pathways. Indeed, PALB2 supports strand  
374 exchange not only with ssDNA, but with ssRNA substrates, and can be involved in transcription-  
375 initiated DNA repair.

## 376 MATERIAL AND METHODS

### 377 Protein Purification:

378 *PALB2 truncations*: PALB2 N-terminal fragments PALB2-T1 (1-200 aa) and PALB2-573 (1-573 aa)  
379 were cloned into pET28b+ based pSMT3 vector (provided by Dr. R.A. Kovall, University of Cincinnati)  
380 containing the N-terminal 6xHis-SUMO tag using *SaI* and *NdeI* cloning sites. pSMT3-PALB2 T1,  
381 pSMT3-PALB2 573 were transformed into BL21\* cells. Cell culture were grown in LB to OD<sub>600</sub>=0.7  
382 and protein expression was induced by adding 0.2 mM IPTG and carried out at 16°C overnight. Cells  
383 were lysed with lysozyme (0.25 mg/mL at RT for 30 min) in lysis buffer (25 mM HEPES pH 8.0, 1 M  
384 NaCl, 10% Glycerol, 0.3% Brij35, 1 mM TCEP, 2 mM CHAPS and 1 mM PMSF), followed by three  
385 rounds of sonication (50% output and 50% pulsar settings for 4 min). Cell debris was removed by  
386 centrifugation at 30,600 x g for 45 min. Supernatant was loaded on a NiNTA column (5 ml) equilibrated  
387 with binding buffer (25 mM HEPES pH 8.0, 1 M NaCl, 10% glycerol, 1 mM TCEP, 2 mM CHAPS and  
388 10 mM imidazole). NiNTA beads were washed with binding buffer and the protein was eluted with  
389 binding buffer supplemented with the same buffer adjusted to 250 mM imidazole. The SUMO tag was  
390 cleaved with Ulp1 protease while dialyzing against buffer without imidazole (25 mM HEPES pH 8.0,  
391 1 M NaCl, 10% Glycerol, 1 mM TCEP and 2 mM CHAPS) overnight and the protein was purified with  
392 a second NiNTA column. The protein was diluted 10X by binding buffer without NaCl to the final NaCl  
393 concentration of 100 mM, loaded to a Hi-Trap heparin affinity column (5 ml, GE health sciences) and  
394 eluted with a gradient of NaCl (100 mM to 1000 mM). Protein eluted from the heparin column at ~500  
395 mM NaCl concentration. Protein fractions were dialysed against storage buffer (25 mM HEPES pH  
396 8.0, 300 M NaCl, 40% Glycerol, 1 mM TCEP and 2 mM CHAPS) overnight, aliquoted and stored in -  
397 80°C.

398 PALB2 T3 fragment was purified as described in (Buisson et al., 2010).

399 *RAD51 purification*: We used two expression constructs and purification protocols. 1) Human RAD51  
400 protein was purified from the pET11-Rad51 vector (gift from Dr A. Mazin) similarly to the published  
401 protocol (Sigurdsson et al., 2001). The protein was induced at 37°C for 3h by supplementing LB media  
402 with 0.5 mM IPTG. Cells were suspended in 25 mM Tris-HCl pH8.0, 1 M urea, 1 M NaCl, 5 mM DTT,  
403 0.3 % Brij35 and 10 % glycerol. Cells were lysed with lysozyme (0.25 mg/mL at RT for 30 min) followed  
404 by three rounds of sonication (50% output and 50% pulsar settings for 1 min). 24 mg/ml ammonium  
405 sulphate was gradually added to the supernatant and equilibrated overnight at 4°C. Precipitates were  
406 centrifugation at 30,600 x g for 45 min. Pellets were solubilized in 30 ml of binding buffer (25 mM Tris-  
407 HCl pH8.0, 1 M NaCl, 5 mM DTT, 10 % glycerol and 20 mM imidazole). Insoluble particles were  
408 removed by centrifugation at 30,600 x g for 40 min. The protein was bound to Ni NTA beads,  
409 extensively washed with binding buffer and eluted in binding buffer supplemented with 250 mM  
410 imidazole.

411 2) Alternatively, human RAD51 gene was cloned into pSMT3 vector using *SalI* and *NdeI* cloning sites.  
412 pSMT3-Rad51 protein expression was carried out at 16°C overnight by addition of 0.2 mM IPTG.  
413 SUMO tagged Rad51 protein was purified according to the steps described for the PALB2 fragments.  
414 Purified Rad51 protein was dialysed against storage buffer (25 mM HEPES pH 8.0, 300 M NaCl, 40%  
415 glycerol, 1 mM TCEP and 2 mM CHAPS) overnight, aliquoted and stored in -80°C until further use.  
416 Proteins from both preparations had comparable properties. Data are shown for experiments  
417 performed with the second construct, except the experiment represented in Fig. S10.

418 *E. coli* RecA was purified exactly as described in (Gupta et al., 2013). *E. coli* RecO and RecR proteins  
419 were purified as described in (Ryzhikov and Korolev, 2012; Ryzhikov et al., 2011).

420 **Site-directed mutagenesis:** Target amino acids were mutated by site directed mutagenesis of using  
421 Stratagene QuikChange™ protocol. Single, double, triple and four residues mutants were generated  
422 by single stranded synthesis (Table S1). PCR samples were subjected to *DpnI* digestion at 37°C for  
423 6 h and annealed gradually by reducing temperature from 95°C to 37°C for an hour with a degree 1C  
424 drop per min. *DpnI* treated PCR samples were transformed into chemically competent OmniMAX cells  
425 (ThermoFischer). Mutations were confirmed by sequencing and plasmids were transformed into  
426 BL21(DE) cells. The PALB2 573 AAAA mutant was generated as described for PALB2 T1. Mutant  
427 proteins were expressed and purified exactly as described for wild type fragments.

428 **DNA binding assay:** Fluorescence anisotropy experiments were carried out at room temperature  
429 with 5 nM fluorescein (6FAM)-labelled DNA substrates (Table S2) using a Synergy 4 plate reader  
430 (BioTek). Titration with protein was performed by serially diluting protein in 40 µL of assay buffer (20  
431 mM Tris Acetate pH 7.0, 100 mM NaCl, 5 % glycerol, 1 mM TCEP and 10% DMSO) from 5000 nM to  
432 0.3 nM and incubating with DNA substrate for 15 min at RT. Fluorescence anisotropy was measured  
433 by excitation at 485/20 nm and by monitoring emission 528/20 nm at room temperature. Data were fit  
434 using a standard four-parameter logistic fit (Prism).

435 **DNA annealing assay:** DNA annealing assays were performed with Cy5-labelled ss35 and  
436 complimentary IOWA-labelled ss35 (100 nM, Table S3). The protein at 1, 2 and 4 µM concentrations  
437 was mixed and incubated with Cy5-labeled ssDNA for 5 min at 37°C in 40 µL reaction buffer (40 mM  
438 HEPES pH 7.5, 20 mM NaCl and 1 mM TCEP). Reaction was initiated by addition of complimentary  
439 IOWA-labelled ss35 (100 nM) in 40 µL of reaction buffer. Decrease in Cy5 fluorescence was  
440 monitored by measuring fluorescence at 680 nm by excitation at 635nm on a Synergy 4 plate reader  
441 (BioTek).

442 **Strand exchange fluorescent assays:** DNA strand exchange assays (80 µl) were performed with  
443 35bp dsDNA obtained by annealing of 5'-Cy5- and 3'-IOWA labelled complimentary strands (Table  
444 S3) and a 90mer ssDNA (ss90) with homologous region to plus strand. Alternatively, FAM/Dabsyl 49



445 bp DNA was used. For the forward reaction, ss90 (100 nM) was incubated with 2  $\mu$ M (or as mentioned  
446 in the figure legends) protein for 10 min in 40  $\mu$ L reaction buffer (40 mM HEPES pH 7.5, 20 mM NaCl,  
447 5 mM MgCl<sub>2</sub>, 1 mM TCEP and 0.02 % Tween 20) at 37°C. Strand exchange was initiated by addition  
448 of 100 nM 35bp dsDNA (ds35), plate was immediately placed in plate reader and the intensity of Cy5  
449 fluorescence was measured at 30 sec intervals for 1 hour with excitation at 635 nm and emission at  
450 680 nm. For reactions with RecA and Rad51, an ATP regeneration system (2 mM ATP, 30 mM  
451 phosphoenol pyruvate and 30 U of pyruvate kinase) was used (Sigma-Aldrich, USA). For the inverse  
452 reaction, protein was incubated with Cy5/IOWA-dsDNA35 substrate and reaction was initiated by  
453 addition of ss90. The strand exchange assay with an ssRNA substrate was performed as described  
454 above using a 60 ribonucleotide RNA (table S1) complimentary to that of 35bp DNA. Alternatively,  
455 Cy3- and Cy5-labelled DNA oligonucleotides were used to prepare dsDNA substrate and the products  
456 were analysed by EMSA PAGE (below).

457 **EMSA PAGE.** Fluorescent-labelled DNA products of strand exchange reactions were also analysed  
458 on EMSA PAGE. After fluorescence measurement on plate reader, the final reaction mix (80  $\mu$ L)  
459 products were deproteinated by incubation with proteinase K (0.5 mg/ml) with 0.5 mM EDTA and 1%  
460 w/v SDS for 20 min at 37°C and the DNA fragments were separated on 10% PAGE gel in TBE buffer.  
461 The gel was imaged using a Typhoon 9400 image scanner (GE) and analysed with ImageJ software.

462 **FRET assay:** FRET assay was performed in 96 well plate format. 100 nM of dual labelled dT<sub>70</sub> (Cy5  
463 at 5' end and Cy3 at 3' end) was dispensed into 80  $\mu$ L assay buffer identical to those in strand  
464 exchange assay (Table 3). Alternatively, dual labelled 40 bp DNA was prepared by annealing dual  
465 labelled 40 nt ssDNA (Cy3 and Cy5 on single strand) with unlabelled complimentary 40 nt ssDNA  
466 (Table 3). Excitation was at 540/25nm bandpass. Emission for both Cy3 at 590/35nm bandpass and  
467 Cy5 at 680/30 nm were monitored at 30 s intervals for 5 min at 37°C, then for 10 min following the  
468 addition of PALB2 N-DBD, then for 10 min following the addition of RAD51 with or without ATP. FRET  
469 efficiency was calculated by using the formula  $FRET = \frac{I_{cy5}}{(I_{cy5}+I_{cy3})}$ . For each addition, the plate was  
470 removed from the plate reader and returned to the reader within 60 s. Protein concentrations were as  
471 described in the figure legends.

472 **RAD51 foci assay:** HeLa cells were seeded on glass coverslips in 6-well plates at 225 000 cells per  
473 well. Knockdown of PALB2 was performed 18 hours later with 50 nM PALB2 siRNA (Table S4) using  
474 Lipofectamine RNAiMAX (Invitrogen). After 5 hours, cells were subjected to double thymidine block.  
475 Briefly, cells were treated with 2 mM thymidine for 18 hours and released after changing the media.  
476 After a release of 9h, PALB2 silenced cells were complemented using transfection with the indicated  
477 YFP constructs using Lipofectamine 2000. Then, cells were treated with 2 mM thymidine for 17 hours  
478 and protected from light from this point on. After 2 h of release from the second block, cells were X-

479 irradiated with 2 Gy and processed for immunofluorescence 4 h post-irradiation. All  
480 immunofluorescence dilutions were prepared in PBS and incubations performed at room temperature  
481 with intervening washes in PBS. Cell fixation was carried out by incubation with 4% paraformaldehyde  
482 for 10 min followed by 100% ice-cold methanol for 5 min at -20 °C. Cells were then permeabilized in  
483 0.2% Triton X-100 for 5 min and quenched using 0.1% sodium borohydride for 5 min. After blocking  
484 for 1 h in a solution containing 10% goat serum and 1% BSA, cells were incubated for 1 h with primary  
485 antibodies to RAD51 (B-bridge International, #70-001) and to cyclin A (BD Biosciences, # 611268)  
486 diluted in 1% BSA. Secondary antibodies, Alexa Fluor 568 goat anti-rabbit (Invitrogen, #A-11011) and  
487 Alexa Fluor 647 goat anti-mouse (Invitrogen, #A-21235), were used in PBS containing 1% BSA for 1  
488 h. Nuclei were stained for 10 min with 1 µg/mL 4, 6-diamidino-2-phenylindole (DAPI) prior to mounting  
489 onto slides with 90% glycerol containing 1 mg/ml paraphenylenediamine anti-fade reagent. Z-stack  
490 images were acquired at 63X magnification on a Leica DM6000 microscope, then deconvolved and  
491 analysed for RAD51 foci formation with Volocity software v6.0.1 (Perkin-Elmer Improvion). The  
492 number of RAD51 foci per cyclin A-positive cells (n=100), among the transfected population, was  
493 manually scored and reported in a scatter dot plot representing the SEM. An Anova test (Kruskal-  
494 Wallis test for multiple comparison) was performed followed by a non-parametric Mann-Whitney test.

495 **CRISPR Cas9/mClover-LMNA1 mediated HR assay (Pinder et al., 2015).** U2OS cells were seeded  
496 in 6-well plates. Knockdown of PALB2 (Buisson et al., 2017a) was performed 6-8 h later using  
497 Lipofectamine RNAiMAX (Invitrogen). Twenty-four hours post-transfection,  $1.5-2 \times 10^6$  cells were  
498 pelleted for each condition and resuspended in 100 µL complete nucleofector solution (SE Cell Line  
499 4D-Nucleofector™ X Kit, Lonza) to which 1µg of pCR2.1-mClover-LMNA donor, 1µg pX330-  
500 LMNAgRNA, 0.1µg of iRFP670 and 1µg of pcDNA3 empty vector or the Flag-PALB2 constructs, and  
501 20nM of each siRNA were added. Once transferred to a 100 ul Lonza certified cuvette, cells were  
502 transfected using the 4D-Nucleofector X-unit, program CM-104 and transferred to a 10 cm dish. After  
503 48 h, cells were trypsinized and plated onto glass coverslips. Expression of the mClover was assayed  
504 the next day by fluorescence microscopy (63X), that is 72h post-nucleofection. Data are represented  
505 as mean percentages of mClover-positive cells over the iRFP-positive population from five  
506 independent experiments (total n>100 iRFP-positive cells) and reported in a scatter dot plot  
507 representing SEM, and a classical one-way Anova test was performed.

## 508 **Plasmids and siRNA**

509 peYFP-C1-PALB2 was modified to be resistant to PALB2 siRNA by Q5 Site-Directed Mutagenesis Kit  
510 (NEB, E0554) using primers JYM3892/3893 (Table S4). The resulting siRNA-resistant construct was  
511 then used as a template to generate the mutant construct YFP-PALB2 146AAAA with the primers  
512 JYM3909/JYM3910. Flag-tagged PALB2 146AAAA mutant was also obtained via site-directed  
513 mutagenesis on pcDNA3-Flag PALB2 (Pauty et al., 2017).

514 **SUPPLEMENTARY DATA**

515 **Supplementary data are available in Supplementary Figures.**

516 **ACKNOWLEDGEMENTS**

517 We are grateful to the members of Korolev lab including Ian Miller for help with cloning, Lakshmi  
518 Kanikkannan and Jennifer Redington for help with protein purification and DNA-binding assays. We  
519 are grateful to Drs Alessandro Vindigni and Joel Eissenberg for the manuscript evaluation and  
520 discussions.

521 **FUNDING**

522 J.-Y.M. is a FRQS Chair in genome stability. The research was supported by Siteman Cancer  
523 Center (SCC) and the Foundation for Barnes-Jewish Hospital Siteman Investment Program (SIP)  
524 [Pre-R01 award to SK]; the Canadian Institutes of Health Research (G.D.); and a Canadian  
525 Institutes of Health Research Foundation grant to J.-Y.M. Funding for open access charge: National  
526 Institute of Health.

527 **CONFLICT OF INTEREST**

528 None declared

529 **REFERENCES**

- 530 Arai, N., Kagawa, W., Saito, K., Shingu, Y., Mikawa, T., Kurumizaka, H., and Shibata, T. (2011). Vital  
531 roles of the second DNA-binding site of Rad52 protein in yeast homologous recombination. *The*  
532 *Journal of biological chemistry* *286*, 17607-17617.
- 533 Badie, S., Escandell, J.M., Bouwman, P., Carlos, A.R., Thanasoula, M., Gallardo, M.M., Suram, A.,  
534 Jaco, I., Benitez, J., Herbig, U., Blasco, M.A., Jonkers, J., and Tarsounas, M. (2010). BRCA2 acts as  
535 a RAD51 loader to facilitate telomere replication and capping. *Nat Struct Mol Biol* *17*, 1461-1469.
- 536 Bleuyard, J.Y., Buisson, R., Masson, J.Y., and Esashi, F. (2012). ChAM, a novel motif that mediates  
537 PALB2 intrinsic chromatin binding and facilitates DNA repair. *EMBO Rep* *13*, 135-141.
- 538 Brouwer, I., Zhang, H., Candelli, A., Normanno, D., Peterman, E.J.G., Wuite, G.J.L., and Modesti, M.  
539 (2017). Human RAD52 Captures and Holds DNA Strands, Increases DNA Flexibility, and Prevents  
540 Melting of Duplex DNA: Implications for DNA Recombination. *Cell reports* *18*, 2845-2853.
- 541 Buisson, R., Dion-Cote, A.M., Coulombe, Y., Launay, H., Cai, H., Stasiak, A.Z., Stasiak, A., Xia, B.,  
542 and Masson, J.Y. (2010). Cooperation of breast cancer proteins PALB2 and piccolo BRCA2 in  
543 stimulating homologous recombination. *Nat Struct Mol Biol* *17*, 1247-1254.
- 544 Buisson, R., Ho, C.K., Joshi, N., Rodrigue, A., Foo, T.K., Hardy, E.J.-L., Haas, W., Xia, B., Dellaire,  
545 G., Masson, J.-Y., and Zou, L. (2017a). Coupling of Homologous Recombination and the Checkpoint  
546 by ATR. *Molecular cell* *65*, 336-346.
- 547 Buisson, R., and Masson, J.Y. (2012). PALB2 self-interaction controls homologous recombination.  
548 *Nucleic Acids Res* *40*, 10312-10323.

- 549 Buisson, R., Niraj, J., Pauty, J., Maity, R., Zhao, W., Coulombe, Y., Sung, P., and Masson, J.Y. (2014).  
550 Breast Cancer Proteins PALB2 and BRCA2 Stimulate Polymerase  $\eta$  in Recombination-Associated  
551 DNA Synthesis at Blocked Replication Forks. *Cell reports* 6, 553-564.
- 552 Buisson, R., Niraj, J., Rodrigue, A., Ho, C.K., Kreuzer, J., Foo, T.K., Hardy, E.J., Delleire, G., Haas,  
553 W., Xia, B., Masson, J.Y., and Zou, L. (2017b). Coupling of Homologous Recombination and the  
554 Checkpoint by ATR. *Mol Cell* 65, 336-346.
- 555 Chen, Z., Yang, H., and Pavletich, N.P. (2008). Mechanism of homologous recombination from the  
556 RecA-ssDNA/dsDNA structures. *Nature* 453, 489-484.
- 557 Chi, P., San Filippo, J., Sehorn, M.G., Petukhova, G.V., and Sung, P. (2007). Bipartite stimulatory  
558 action of the Hop2-Mnd1 complex on the Rad51 recombinase. *Genes Dev* 21, 1747-1757.
- 559 Davies, A.A., Masson, J.Y., McIlwraith, M.J., Stasiak, A.Z., Stasiak, A., Venkitaraman, A.R., and West,  
560 S.C. (2001). Role of BRCA2 in control of the RAD51 recombination and DNA repair protein. *Mol Cell*  
561 7, 273-282.
- 562 Dray, E., Etchin, J., Wiese, C., Saro, D., Williams, G.J., Hammel, M., Yu, X., Galkin, V.E., Liu, D.,  
563 Tsai, M.S., Sy, S.M., Schild, D., Egelman, E., Chen, J., and Sung, P. (2010). Enhancement of RAD51  
564 recombinase activity by the tumor suppressor PALB2. *Nat Struct Mol Biol* 17, 1255-1259.
- 565 Egelman, E.H., and Stasiak, A. (1986). Structure of helical RecA-DNA complexes. Complexes formed  
566 in the presence of ATP- $\gamma$ -S or ATP. *Journal of molecular biology* 191, 677-697.
- 567 Grimme, J.M., Honda, M., Wright, R., Okuno, Y., Rothenberg, E., Mazin, A.V., Ha, T., and Spies, M.  
568 (2010). Human Rad52 binds and wraps single-stranded DNA and mediates annealing via two  
569 hRad52-ssDNA complexes. *Nucleic Acids Res* 38, 2917-2930.
- 570 Guidugli, L., Pankratz, V.S., Singh, N., Thompson, J., Erding, C.A., Engel, C., Schmutzler, R.,  
571 Domchek, S., Nathanson, K., Radice, P., Singer, C., Tonin, P.N., Lindor, N.M., Goldgar, D.E., and  
572 Couch, F.J. (2013). A classification model for BRCA2 DNA binding domain missense variants based  
573 on homology-directed repair activity. *Cancer Res* 73, 265-275.
- 574 Gupta, R., Ryzhikov, M., Koroleva, O., Unciuleac, M., Shuman, S., Korolev, S., and Glickman, M.S.  
575 (2013). A dual role for mycobacterial RecO in RecA-dependent homologous recombination and RecA-  
576 independent single-strand annealing. *Nucleic Acids Res* 41, 2284-2295.
- 577 Hayakawa, T., Zhang, F., Hayakawa, N., Ohtani, Y., Shinmyozu, K., Nakayama, J., and Andreassen,  
578 P.R. (2010). MRG15 binds directly to PALB2 and stimulates homology-directed repair of  
579 chromosomal breaks. *Journal of cell science* 123, 1124-1130.
- 580 Honda, M., Okuno, Y., Yoo, J., Ha, T., and Spies, M. (2011). Tyrosine phosphorylation enhances  
581 RAD52-mediated annealing by modulating its DNA binding. *Embo J* 30, 3368-3382.
- 582 Howlett, N.G., Taniguchi, T., Olson, S., Cox, B., Waisfisz, Q., De Die-Smulders, C., Persky, N.,  
583 Grompe, M., Joenje, H., Pals, G., Ikeda, H., Fox, E.A., and D'Andrea, A.D. (2002). Biallelic inactivation  
584 of BRCA2 in Fanconi anemia. *Science* 297, 606-609.
- 585 Jensen, R.B., Carreira, A., and Kowalczykowski, S.C. (2010). Purified human BRCA2 stimulates  
586 RAD51-mediated recombination. *Nature* 467, 678-683.

- 587 Kagawa, W., Kurumizaka, H., Ishitani, R., Fukai, S., Nureki, O., Shibata, T., and Yokoyama, S. (2002).  
588 Crystal structure of the homologous-pairing domain from the human Rad52 recombinase in the  
589 undecameric form. *Mol Cell* 10, 359-371.
- 590 Kang, H.A., Shin, H.C., Kalantzi, A.S., Toseland, C.P., Kim, H.M., Gruber, S., Peraro, M.D., and Oh,  
591 B.H. (2015). Crystal structure of Hop2-Mnd1 and mechanistic insights into its role in meiotic  
592 recombination. *Nucleic Acids Res* 43, 3841-3856.
- 593 Kantake, N., Madiraju, M.V., Sugiyama, T., and Kowalczykowski, S.C. (2002). Escherichia coli RecO  
594 protein anneals ssDNA complexed with its cognate ssDNA-binding protein: A common step in genetic  
595 recombination. *Proceedings of the National Academy of Sciences of the United States of America* 99,  
596 15327-15332.
- 597 Kasahara, M., Clikeman, J.A., Bates, D.B., and Kogoma, T. (2000). RecA protein-dependent R-loop  
598 formation in vitro. *Genes Dev* 14, 360-365.
- 599 Krejci, L., Song, B., Bussen, W., Rothstein, R., Mortensen, U.H., and Sung, P. (2002). Interaction with  
600 Rad51 is indispensable for recombination mediator function of Rad52. *The Journal of biological*  
601 *chemistry* 277, 40132-40141.
- 602 Leger, J.F., Robert, J., Bourdieu, L., Chatenay, D., and Marko, J.F. (1998). RecA binding to a single  
603 double-stranded DNA molecule: a possible role of DNA conformational fluctuations. *Proceedings of*  
604 *the National Academy of Sciences of the United States of America* 95, 12295-12299.
- 605 Liu, J., Doty, T., Gibson, B., and Heyer, W.D. (2010). Human BRCA2 protein promotes RAD51  
606 filament formation on RPA-covered single-stranded DNA. *Nat Struct Mol Biol* 17, 1260-1262.
- 607 Lomonosov, M., Anand, S., Sangrithi, M., Davies, R., and Venkitaraman, A.R. (2003). Stabilization of  
608 stalled DNA replication forks by the BRCA2 breast cancer susceptibility protein. *Genes Dev* 17, 3017-  
609 3022.
- 610 Luijsterburg, M.S., Typas, D., Caron, M.C., Wiegant, W.W., van den Heuvel, D., Boonen, R.A.,  
611 Couturier, A.M., Mullenders, L.H., Masson, J.Y., and van Attikum, H. (2017). A PALB2-interacting  
612 domain in RNF168 couples homologous recombination to DNA break-induced chromatin  
613 ubiquitylation. *eLife* 6.
- 614 Luisi-DeLuca, C., and Kolodner, R. (1994). Purification and characterization of the Escherichia coli  
615 RecO protein. Renaturation of complementary single-stranded DNA molecules catalyzed by the RecO  
616 protein. *Journal of molecular biology* 236, 124-138.
- 617 Ma, J., Cai, H., Wu, T., Sobhian, B., Huo, Y., Alcivar, A., Mehta, M., Cheung, K.L., Ganesan, S., Kong,  
618 A.N., Zhang, D.D., and Xia, B. (2012). PALB2 interacts with KEAP1 to promote NRF2 nuclear  
619 accumulation and function. *Mol Cell Biol* 32, 1506-1517.
- 620 Mazin, A.V., and Kowalczykowski, S.C. (1998). The function of the secondary DNA-binding site of  
621 RecA protein during DNA strand exchange. *EMBO J* 17, 1161-1168.
- 622 Mazina, O.M., Keskin, H., Hanamshet, K., Storici, F., and Mazin, A.V. (2017). Rad52 Inverse Strand  
623 Exchange Drives RNA-Templated DNA Double-Strand Break Repair. *Mol Cell* 67, 19-29 e13.
- 624 Mazloum, N., and Holloman, W.K. (2009). Second-end capture in DNA double-strand break repair  
625 promoted by Brh2 protein of *Ustilago maydis*. *Mol Cell* 33, 160-170.

- 626 McIlwraith, M.J., and West, S.C. (2008). DNA repair synthesis facilitates RAD52-mediated second-  
627 end capture during DSB repair. *Mol Cell* 29, 510-516.
- 628 Moldovan, G.L., and D'Andrea, A.D. (2009). How the fanconi anemia pathway guards the genome.  
629 *Annu Rev Genet* 43, 223-249.
- 630 Moynahan, M.E., Pierce, A.J., and Jasin, M. (2001). BRCA2 is required for homology-directed repair  
631 of chromosomal breaks. *Mol Cell* 7, 263-272.
- 632 New, J.H., Sugiyama, T., Zaitseva, E., and Kowalczykowski, S.C. (1998). Rad52 protein stimulates  
633 DNA strand exchange by Rad51 and replication protein A. *Nature* 391, 407-410.
- 634 Nimonkar, A.V., Sica, R.A., and Kowalczykowski, S.C. (2009). Rad52 promotes second-end DNA  
635 capture in double-stranded break repair to form complement-stabilized joint molecules. *Proceedings*  
636 *of the National Academy of Sciences of the United States of America* 106, 3077-3082.
- 637 Oliver, A.W., Swift, S., Lord, C.J., Ashworth, A., and Pearl, L.H. (2009). Structural basis for recruitment  
638 of BRCA2 by PALB2. *EMBO Rep* 10, 990-996.
- 639 Orthwein, A., Noordermeer, S.M., Wilson, M.D., Landry, S., Enchev, R.I., Sherker, A., Munro, M.,  
640 Pinder, J., Salsman, J., Dellaire, G., Xia, B., Peter, M., and Durocher, D. (2015). A mechanism for the  
641 suppression of homologous recombination in G1 cells. *Nature* 528, 422-426.
- 642 Park, J.Y., Singh, T.R., Nassar, N., Zhang, F., Freund, M., Hanenberg, H., Meetei, A.R., and  
643 Andreassen, P.R. (2014a). Breast cancer-associated missense mutants of the PALB2 WD40 domain,  
644 which directly binds RAD51C, RAD51 and BRCA2, disrupt DNA repair. *Oncogene* 33, 4803-4812.
- 645 Park, J.Y., Zhang, F., and Andreassen, P.R. (2014b). PALB2: The hub of a network of tumor  
646 suppressors involved in DNA damage responses. *Biochimica et biophysica acta* 1846, 263-275.
- 647 Paull, T.T., Cortez, D., Bowers, B., Elledge, S.J., and Gellert, M. (2001). Direct DNA binding by Brca1.  
648 *Proceedings of the National Academy of Sciences of the United States of America* 98, 6086-6091.
- 649 Pauty, J., Couturier, A.M., Rodrigue, A., Caron, M.C., Coulombe, Y., Dellaire, G., and Masson, J.Y.  
650 (2017). Cancer-causing mutations in the tumor suppressor PALB2 reveal a novel cancer mechanism  
651 using a hidden nuclear export signal in the WD40 repeat motif. *Nucleic acids research* 45, 2644-2657.
- 652 Pauty, J., Rodrigue, A., Couturier, A., Buisson, R., and Masson, J.Y. (2014). Exploring the roles of  
653 PALB2 at the crossroads of DNA repair and cancer. *The Biochemical journal* 460, 331-342.
- 654 Pellegrini, L., Yu, D.S., Lo, T., Anand, S., Lee, M., Blundell, T.L., and Venkitaraman, A.R. (2002).  
655 Insights into DNA recombination from the structure of a RAD51-BRCA2 complex. *Nature* 420, 287-  
656 293.
- 657 Pinder, J., Salsman, J., and Dellaire, G. (2015). Nuclear domain 'knock-in' screen for the evaluation  
658 and identification of small molecule enhancers of CRISPR-based genome editing. *Nucleic Acids Res*  
659 43, 9379-9392.
- 660 Prakash, R., Zhang, Y., Feng, W., and Jasin, M. (2015). Homologous Recombination and Human  
661 Health: The Roles of BRCA1, BRCA2, and Associated Proteins. *Cold Spring Harb Perspect Biol* 7.
- 662 Roy, R., Kozlov, A.G., Lohman, T.M., and Ha, T. (2007). Dynamic structural rearrangements between  
663 DNA binding modes of E. coli SSB protein. *Journal of molecular biology* 369, 1244-1257.

- 664 Ryzhikov, M., Gupta, R., Glickman, M., and Korolev, S. (2014). RecO protein initiates DNA  
665 recombination and strand annealing through two alternative DNA binding mechanisms. *The Journal*  
666 *of biological chemistry* 289, 28846-28855.
- 667 Ryzhikov, M., and Korolev, S. (2012). Structural studies of SSB interaction with RecO. *Methods Mol*  
668 *Biol* 922, 123-131.
- 669 Ryzhikov, M., Koroleva, O., Postnov, D., Tran, A., and Korolev, S. (2011). Mechanism of RecO  
670 recruitment to DNA by single-stranded DNA binding protein. *Nucleic Acids Res* 39, 6305-6314.
- 671 Saotome, M., Saito, K., Yasuda, T., Ohtomo, H., Sugiyama, S., Nishimura, Y., Kurumizaka, H., and  
672 Kagawa, W. (2018). Structural Basis of Homology-Directed DNA Repair Mediated by RAD52.  
673 *iScience* 3, 50-62.
- 674 Schlacher, K., Christ, N., Siaud, N., Egashira, A., Wu, H., and Jasin, M. (2011). Double-strand break  
675 repair-independent role for BRCA2 in blocking stalled replication fork degradation by MRE11. *Cell*  
676 145, 529-542.
- 677 Seong, C., Sehorn, M.G., Plate, I., Shi, I., Song, B., Chi, P., Mortensen, U., Sung, P., and Krejci, L.  
678 (2008). Molecular anatomy of the recombination mediator function of *Saccharomyces cerevisiae*  
679 Rad52. *The Journal of biological chemistry* 283, 12166-12174.
- 680 Sharan, S.K., Morimatsu, M., Albrecht, U., Lim, D.S., Regel, E., Dinh, C., Sands, A., Eichele, G.,  
681 Hasty, P., and Bradley, A. (1997). Embryonic lethality and radiation hypersensitivity mediated by  
682 Rad51 in mice lacking Brca2. *Nature* 386, 804-810.
- 683 Shinohara, A., Shinohara, M., Ohta, T., Matsuda, S., and Ogawa, T. (1998). Rad52 forms ring  
684 structures and co-operates with RPA in single-strand DNA annealing. *Genes Cells* 3, 145-156.
- 685 Siaud, N., Barbera, M.A., Egashira, A., Lam, I., Christ, N., Schlacher, K., Xia, B., and Jasin, M. (2011).  
686 Plasticity of BRCA2 function in homologous recombination: genetic interactions of the PALB2 and  
687 DNA binding domains. *PLoS Genet* 7, e1002409.
- 688 Sigurdsson, S., Trujillo, K., Song, B., Stratton, S., and Sung, P. (2001). Basis for avid homologous  
689 DNA strand exchange by human Rad51 and RPA. *The Journal of biological chemistry* 276, 8798-  
690 8806.
- 691 Singleton, M.R., Wentzell, L.M., Liu, Y., West, S.C., and Wigley, D.B. (2002). Structure of the single-  
692 strand annealing domain of human RAD52 protein. *Proceedings of the National Academy of Sciences*  
693 *of the United States of America* 99, 13492-13497.
- 694 Sy, S.M., Huen, M.S., and Chen, J. (2009a). MRG15 is a novel PALB2-interacting factor involved in  
695 homologous recombination. *The Journal of biological chemistry* 284, 21127-21131.
- 696 Sy, S.M., Huen, M.S., and Chen, J. (2009b). PALB2 is an integral component of the BRCA complex  
697 required for homologous recombination repair. *Proceedings of the National Academy of Sciences of*  
698 *the United States of America* 106, 7155-7160.
- 699 Sy, S.M., Huen, M.S., Zhu, Y., and Chen, J. (2009c). PALB2 regulates recombinational repair through  
700 chromatin association and oligomerization. *The Journal of biological chemistry* 284, 18302-18310.
- 701 Thorslund, T., McIlwraith, M.J., Compton, S.A., Lekomtsev, S., Petronczki, M., Griffith, J.D., and West,  
702 S.C. (2010). The breast cancer tumor suppressor BRCA2 promotes the specific targeting of RAD51  
703 to single-stranded DNA. *Nat Struct Mol Biol* 17, 1263-1265.

- 704 Umezū, K., Chi, N.W., and Kolodner, R.D. (1993). Biochemical interaction of the *Escherichia coli*  
705 RecF, RecO, and RecR proteins with RecA protein and single-stranded DNA binding protein.  
706 *Proceedings of the National Academy of Sciences of the United States of America* *90*, 3875-3879.
- 707 Umezū, K., and Kolodner, R.D. (1994). Protein interactions in genetic recombination in *Escherichia*  
708 *coli*. Interactions involving RecO and RecR overcome the inhibition of RecA by single-stranded DNA-  
709 binding protein. *The Journal of biological chemistry* *269*, 30005-30013.
- 710 Venkitaraman, A.R. (2000). The breast cancer susceptibility gene, BRCA2: at the crossroads between  
711 DNA replication and recombination? *Philos Trans R Soc Lond B Biol Sci* *355*, 191-198.
- 712 Venkitaraman, A.R. (2014). Cancer suppression by the chromosome custodians, BRCA1 and  
713 BRCA2. *Science* *343*, 1470-1475.
- 714 Wu, K., Hinson, S.R., Ohashi, A., Farrugia, D., Wendt, P., Tavtigian, S.V., Deffenbaugh, A., Goldgar,  
715 D., and Couch, F.J. (2005). Functional evaluation and cancer risk assessment of BRCA2 unclassified  
716 variants. *Cancer Res* *65*, 417-426.
- 717 Xia, B., Dorsman, J.C., Ameziane, N., de Vries, Y., Rooimans, M.A., Sheng, Q., Pals, G., Errami, A.,  
718 Gluckman, E., Llera, J., Wang, W., Livingston, D.M., Joenje, H., and de Winter, J.P. (2007). Fanconi  
719 anemia is associated with a defect in the BRCA2 partner PALB2. *Nat Genet* *39*, 159-161.
- 720 Xia, B., Sheng, Q., Nakanishi, K., Ohashi, A., Wu, J., Christ, N., Liu, X., Jasin, M., Couch, F.J., and  
721 Livingston, D.M. (2006). Control of BRCA2 cellular and clinical functions by a nuclear partner, PALB2.  
722 *Mol Cell* *22*, 719-729.
- 723 Yang, S., VanLoock, M.S., Yu, X., and Egelman, E.H. (2001). Comparison of bacteriophage T4 UvsX  
724 and human Rad51 filaments suggests that RecA-like polymers may have evolved independently.  
725 *Journal of molecular biology* *312*, 999-1009.
- 726 Zaitsev, E.N., and Kowalczykowski, S.C. (2000). A novel pairing process promoted by *Escherichia*  
727 *coli* RecA protein: inverse DNA and RNA strand exchange. *Genes Dev* *14*, 740-749.
- 728 Zhang, F., Fan, Q., Ren, K., and Andreassen, P.R. (2009a). PALB2 functionally connects the breast  
729 cancer susceptibility proteins BRCA1 and BRCA2. *Mol Cancer Res* *7*, 1110-1118.
- 730 Zhang, F., Ma, J., Wu, J., Ye, L., Cai, H., Xia, B., and Yu, X. (2009b). PALB2 links BRCA1 and BRCA2  
731 in the DNA-damage response. *Curr Biol* *19*, 524-529.
- 732 Zhao, W., Steinfeld, J.B., Liang, F., Chen, X., Maranon, D.G., Jian Ma, C., Kwon, Y., Rao, T., Wang,  
733 W., Sheng, C., Song, X., Deng, Y., Jimenez-Sainz, J., Lu, L., Jensen, R.B., Xiong, Y., Kupfer, G.M.,  
734 Wiese, C., Greene, E.C., and Sung, P. (2017). BRCA1-BARD1 promotes RAD51-mediated  
735 homologous DNA pairing. *Nature* *550*, 360-365.
- 736



**Table S1.** Primers for DNA binding site mutagenesis.

| <b>Mutation</b>    | <b>Sequence</b>                                     |
|--------------------|-----------------------------------------------------|
| RK146AA F          | ACT GCC GAG CGC TCG TGC AAA ACA ACA AAA GC          |
| RK146AA R          | GCT TTT GTT GTT TTG CAC GAG CGC TCG GCA GT          |
| RK147AA F          | ACT GCC GAG CCG TGC TAA AGC ACA ACA AAA GC          |
| RK147AA R          | GCT TTT GTT GTG CTT TAG CAC GGC TCG GCA GT          |
| KKK90AAA F         | CGA AAA AAT TGC ACA TAG CAT TGC AGC AAC GGT GGA AG  |
| KKK90AAA R         | CTT CCA CCG TTG CTG CAA TGC TAT GTG CAA TTT TTT CG  |
| K90A F             | CGA AAA AAT TGC ACA TAG CAT TAA AAA AAC             |
| K90A R             | GTT TTT TTA ATG CTA TGT GCA ATT TTT TCG             |
| K94A F             | AAT TAA ACA TAG CAT TGC AAA AAC GGT GGA AG          |
| K94A R             | CTT CCA CCG TTT TTG CAA TGC TAT GTT TAA TT          |
| K95A F             | CAT AGC ATT AAA GCA ACG GTG GAA GAA C               |
| K95A R             | GTT CTT CCA CCG TTG CTT TAA TGC TAT G               |
| RKR190AAA F        | CCG ATT CGT TAG CTC TGA GCG GCG CAG CGC TGA AAG AAC |
| RKR190AAA R        | GTT CTT TCA GCG CTG CGC CGC TCA GAG CTA ACG AAT CGG |
| R190A F            | CCG ATT CGT TAG CTC TGA GCG G                       |
| R190A R            | CCG CTC AGA GCT AAC GAA TCG G                       |
| K194A F            | CTG AGC GGC GCA CGG CTG AAA GAA C                   |
| K194A R            | GTT CTT TCA GCC GTG CGC CGC TCA G                   |
| R195A F            | CTG AGC GGC AAA GCG CTG AAA GAA CAG                 |
| R195A R            | CTG TTC TTT CAG CGC TTT GCC GCT CAG                 |
| KR174,175A F       | CTG AGC GGC GCA GCG CTG AAA GAA CAG                 |
| KR174,175A R       | CTG TTC TTT CAG CGC TGC GCC GCT CAG                 |
| KK49,50AA F        | A ATT AAA CAT AGC ATT GCA GCA ACG GTG GAA G         |
| KK49,50AA R        | CTT CCA CCG TTG CTG CAA TGC TAT GTT TAA TT          |
| RRKK146AAAA F      | AAA CTG CCG AGC GCT GCT GCA GCA CAA CAA AAG CGC     |
| RRKK146AAAA R      | GCG CTT TTG TTG TGC TGC AGC AGC GCT CGG CAG TTT     |
| K148A F            | GAG CCG TCG TGC CAA ACA ACA AAA G                   |
| K148A R            | CTT TTG TTG TTT GGC ACG ACG GCT C                   |
| R146A F            | ACT GCC GAG CGC TCG TAA AAA AC                      |
| R146A R            | GTT TTT TAC GAG CGC TCG GCA GT                      |
| K148A – RK147      | GAG CCG TGC TGC CGC ACA ACA AAA G                   |
| K148A – RK147      | CTT TTG TTG TGC GGC AGC ACG GCT C                   |
| R146A –RK147       | ACT GCC GAG CGC CGC TAA AGC AC                      |
| R146A –RK147       | GTG CTT TAG CGG CGC TCG GCA GT                      |
| RK146,148AA –RK147 | ACT GCC GAG CGC CGC TGC GGC ACA ACA AAA G           |
| RK146,148AA –RK147 | CTT TTG TTG TGC CGC AGC GGC GCT CGG CAG T           |
| 146AAAA (JYM3909F) | GCGGCGCAGCAGAAGAGGACATTTATTTT                       |
| 146AAAA (JYM3910R) | TGCTGCGCTTGCCAGCTTCTGCTT                            |

**Table S2.** Substrates for DNA binding assay.

| Sample   | Sequence                                                                    |
|----------|-----------------------------------------------------------------------------|
| 15-FAM   | /56-FAM/-CCGCTACCAGTGATC                                                    |
| 15-comp  | GATCACTGGTAGCGG                                                             |
| 20-FAM   | /56-FAM/-CCGCTACCAGTGATCACCAA                                               |
| 20-comp  | TTGGTGATCACTGGTAGCGG                                                        |
| 25-FAM   | /56-FAM/-CCGCTACCAGTGATCACCAATGGAT                                          |
| 25-comp  | ATCCATTGGTGATCACTGGTAGCGG                                                   |
| 30-FAM   | /56-FAM/-CCG CTA CCA GTG ATC ACC AAT GGA TTG CTA -                          |
| 30-comp  | TAGCAATCCATTGGTGATCACTGGTAGCGG                                              |
| 49-FAM   | /56-FAM/ -TGG CGA CGG CAG CGA GGC TCT CTA CAG GAG CCT GTT AAG TGC TTG TAA C |
| 49-comp  | TTA CAA GCA CTT AAC AGG CTC CTG TAG AGA GCC TCG CTG CCG TCG CCA-3'          |
| dT30-FAM | /56-FAM/-(30)T                                                              |
| dT49-FAM | /56-FAM/-(49)T                                                              |
| dT71-FAM | /56-FAM/-(71)T                                                              |

**Table S3.** Substrates for strand exchange activity and FRET assays.

| Sample            | Sequence                                                                                             |
|-------------------|------------------------------------------------------------------------------------------------------|
| 35mer-Cy5         | AGGTCTTGTTTCGCAGATGGCTTAGAGCTTATTTGC-/Cy5Sp/                                                         |
| 35mer-IA-comp     | /IA/-GCAAATAAGCTCTAAGCCATCTGCGAACAAGACCT                                                             |
| 35mer-Cy3         | AGGTCTTGTTTCGCAGATGGCTTAGAGCTTATTTGC-/Cy3Sp/                                                         |
| 35mer-Cy5-comp    | /CY5/-GCAAATAAGCTCTAAGCCATCTGCGAACAAGACCT-3'                                                         |
| ss90-1 (for ds35) | GCCTCTAGTCGAGGCATCAATACGAAACCTTATTCTTTTCAGTCT<br>ACAAGCACTTAAGGTCTTGTTTCGCAGATGGCTTAGAGCTTATTT<br>GC |
| 49mer-FAM         | /6FAM/-TGG CGA CGG CAG CGA GGC TCT CTA CAG GAG CCT GTT AAG TGC<br>TTG TAA                            |
| 49mer-DAB-comp    | GTT ACA AGC ACT TAA CAG GCT CCT GTA GAG AGC CTC GCT GCC GTC<br>GCC A-/DAB/                           |
| ss90-2 (for ds49) | CACTTAAGGTCTTGTTTCGCAGATGGCTTAGAGCTTATTTGCGTT<br>ACAAGCACTTAACAGGCTCCTGTAGAGAGCCTCGCTGCCGTCCCA       |
| RNA60             | TACGAAACCTTATTCTTTTCAGTCTACAAGCACTTAAGGTCTTGTT<br>CGCAGATGGCTTAGAGCTTATTTGC                          |
| Cy3-dT70-Cy5      | /Cy3Sp/-dT <sub>70</sub> -/Cy5Sp/                                                                    |
| Cy3-ds40-Cy5      | /Cy5Sp/-ATAAGAGGTCATTTTTGCGGATGGCTTAGAGCTTAATTGC-/Cy5Sp/<br>GCAATTAAGCTCTAAGCCATCCGCAAAAATGACCTCTTAT |

**Table S4.** siRNA resistance primers:

|                        |                            |
|------------------------|----------------------------|
| JYM3892                | gatCTTATTGTTCTACCAGGAAAATC |
| JYM3893                | ttccTCTAAGTCCTCCATTTCTG    |
| siRNA target sequences |                            |
| siCTL                  | UUCGAACGUGUCACGUCAA        |
| siPALB2                | CUUAGAAGAGGACCUUAUU        |

Figure S1

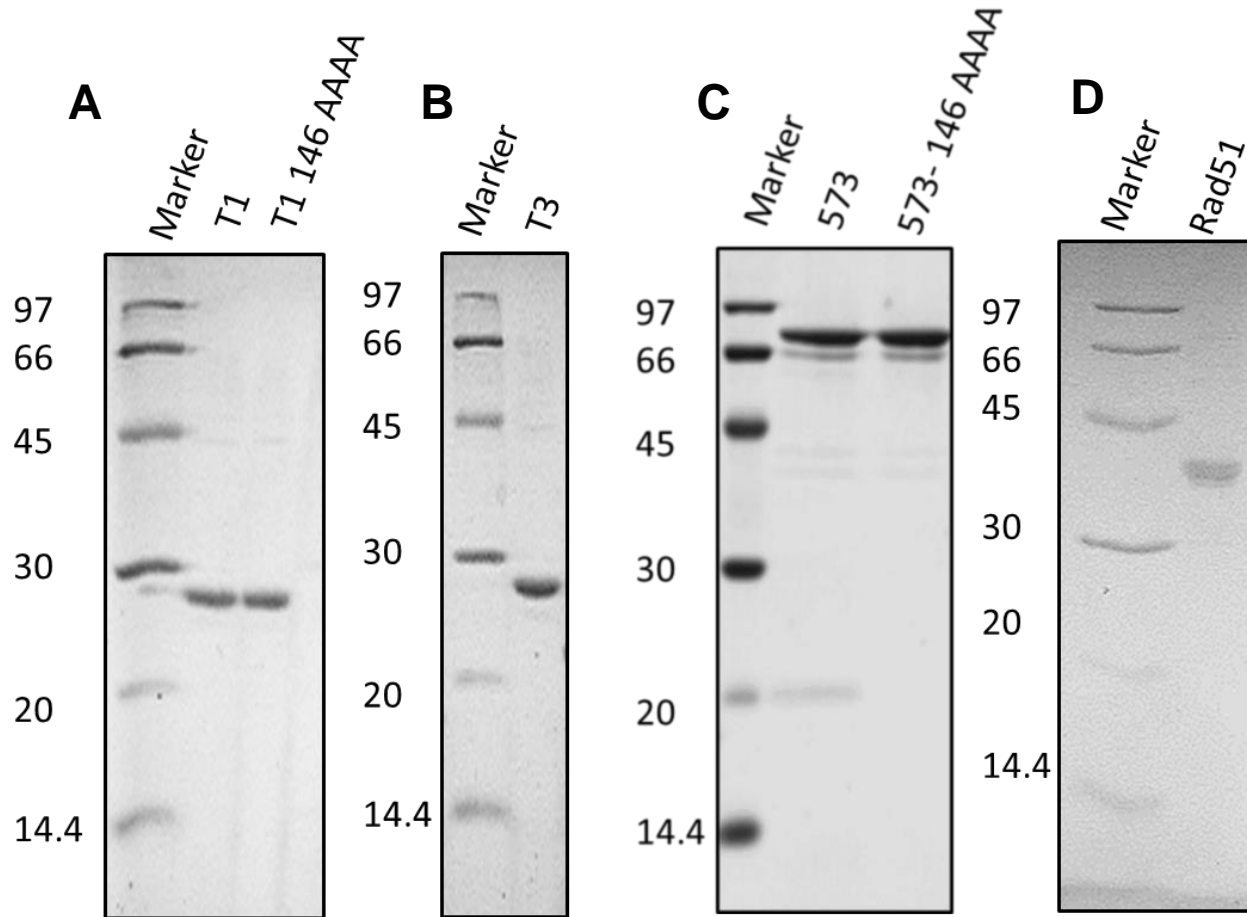

Figure S2

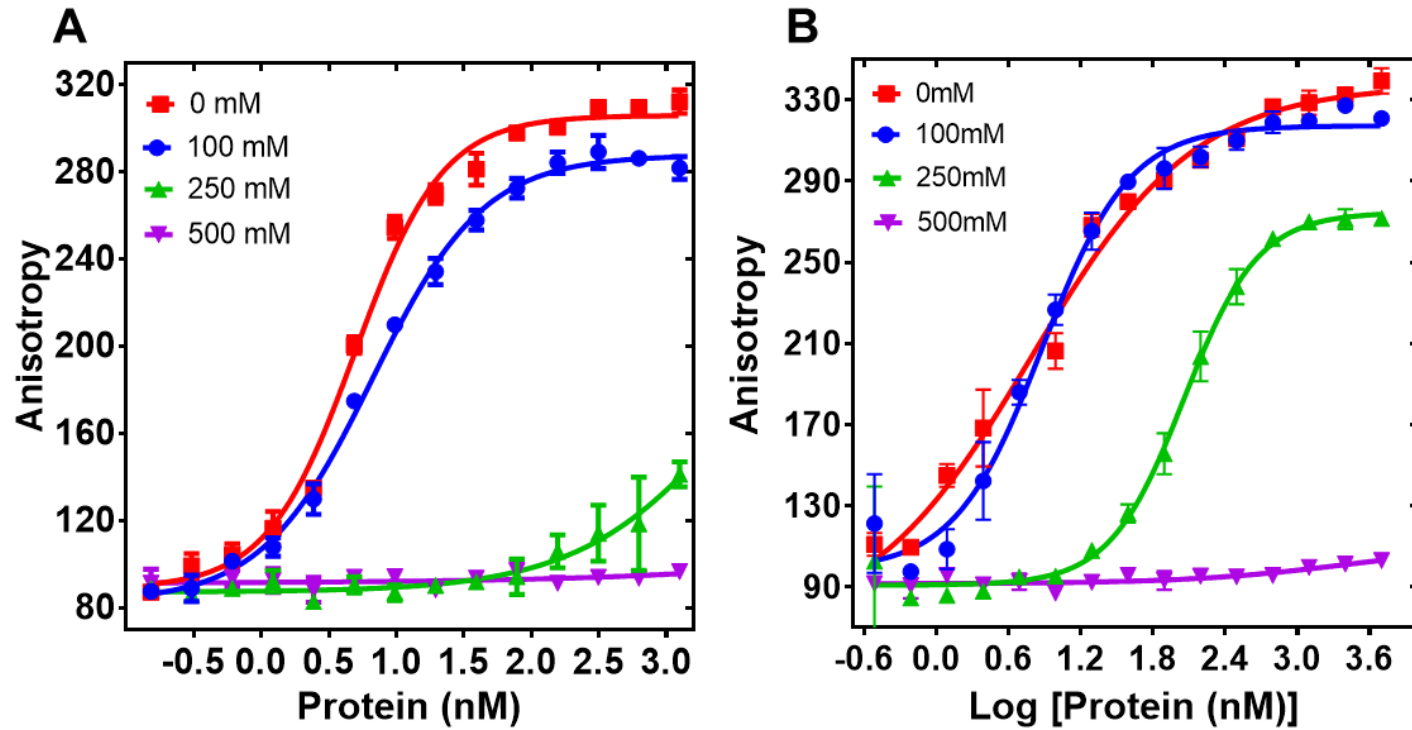

Figure S3

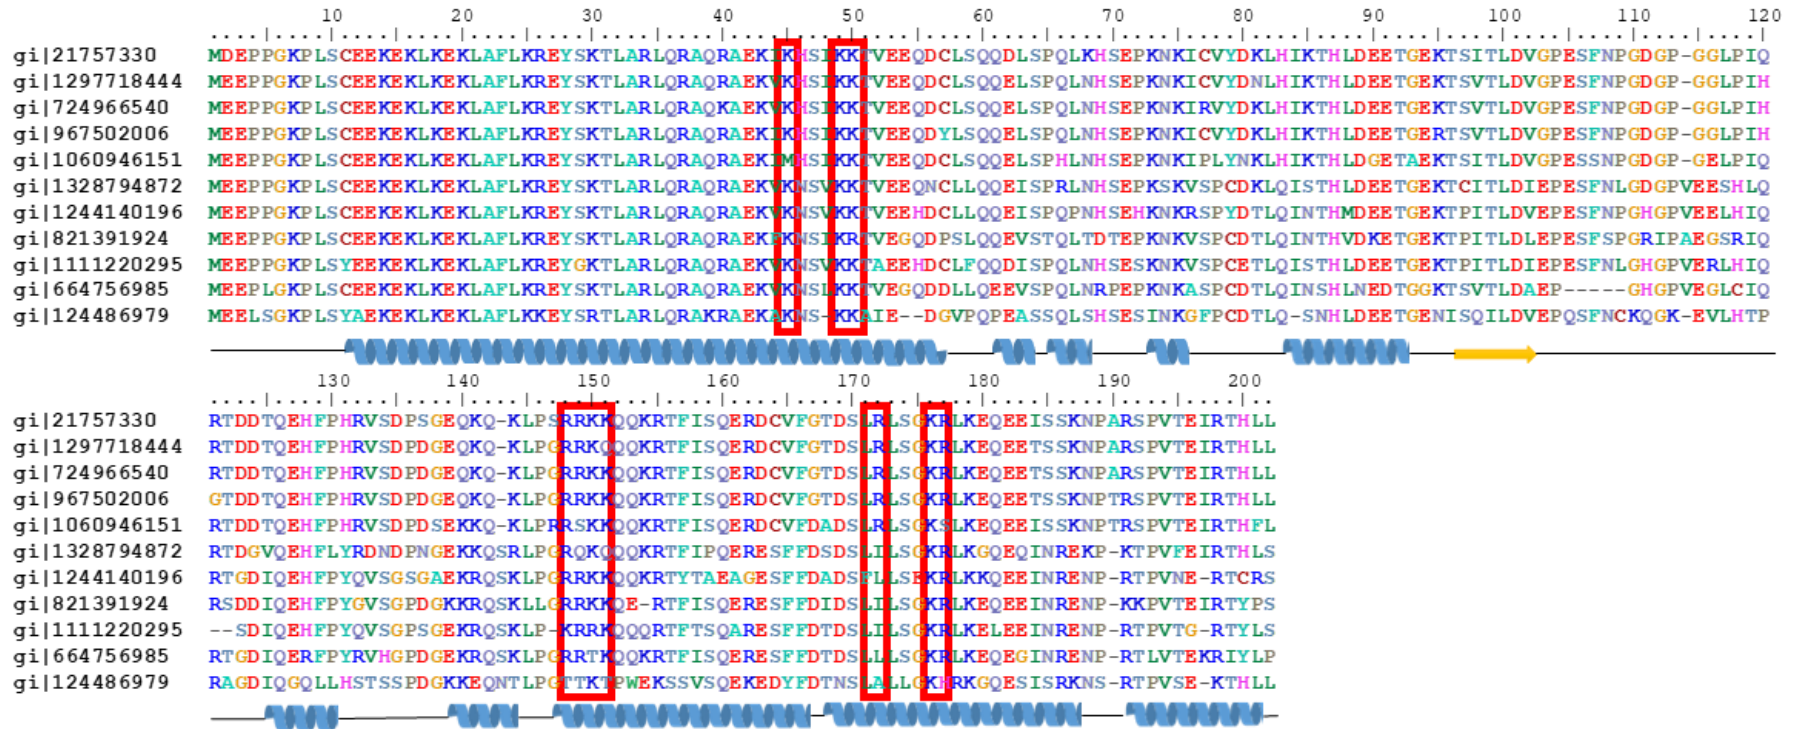

Figure S4

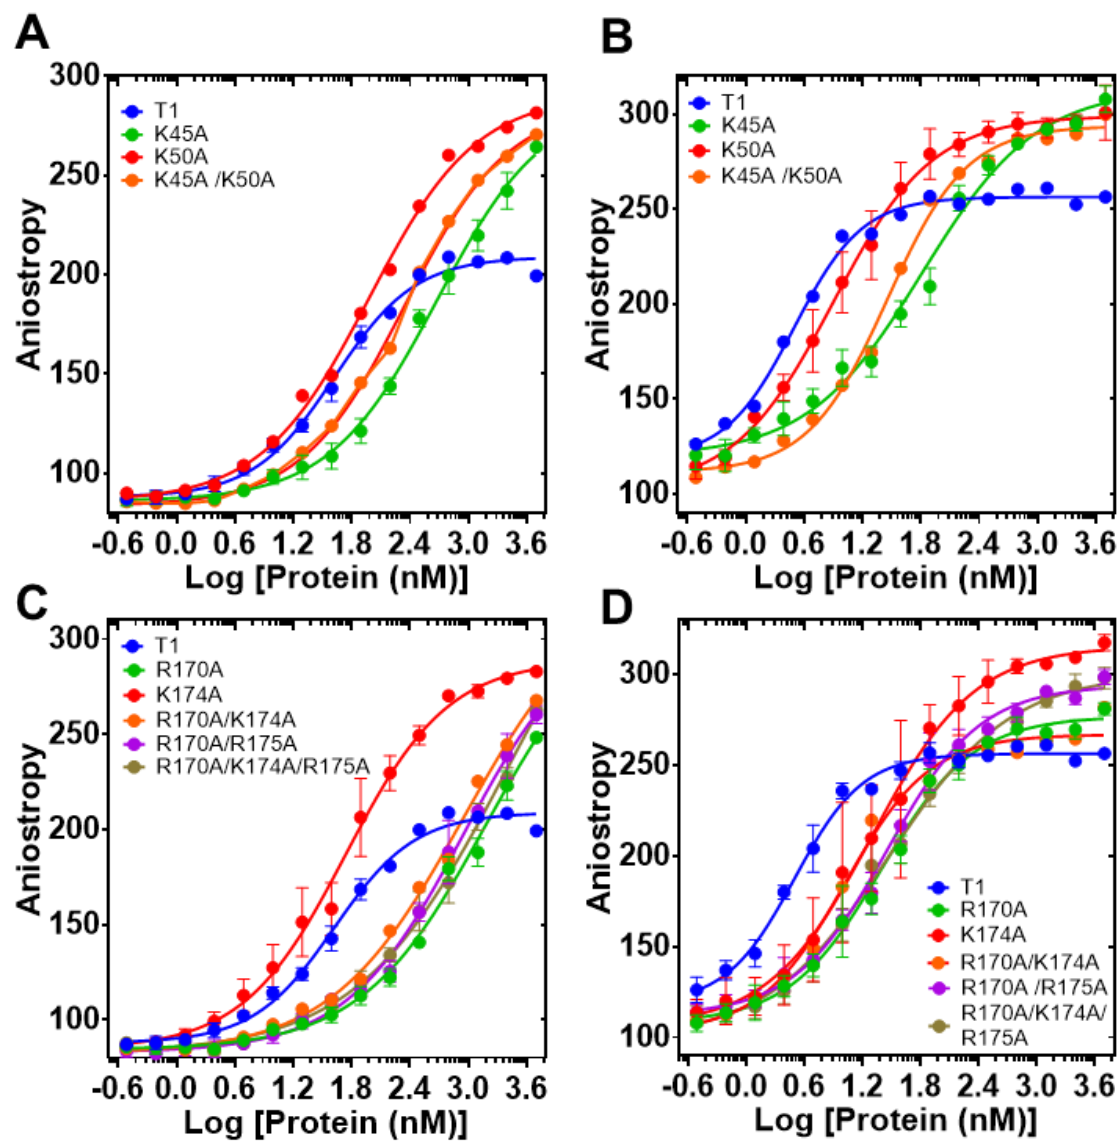

Figure S5

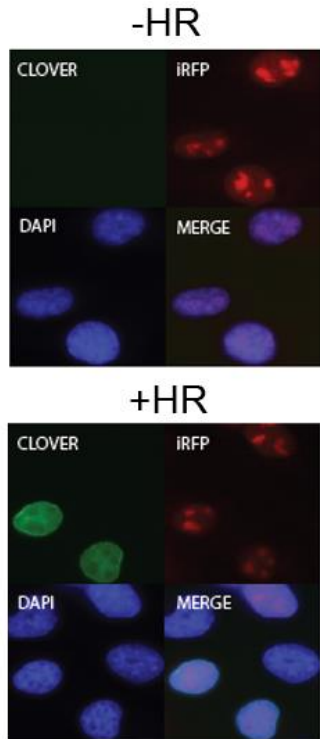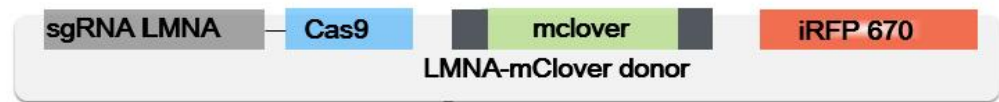

Nucleofection

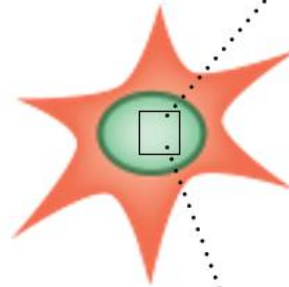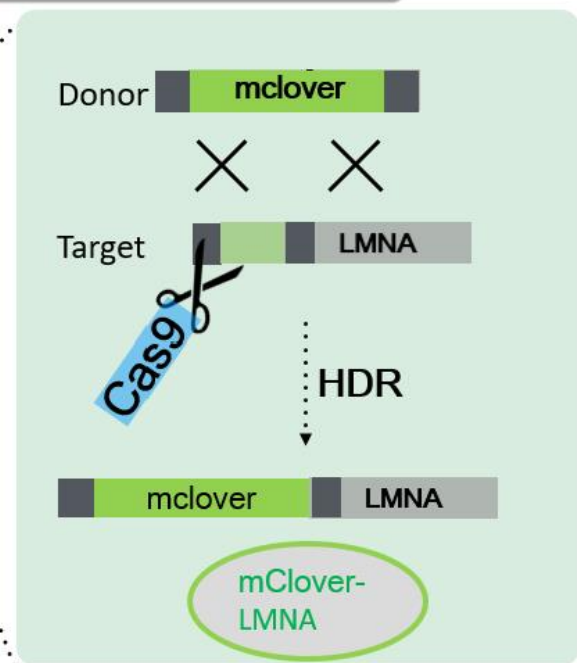



Figure S6

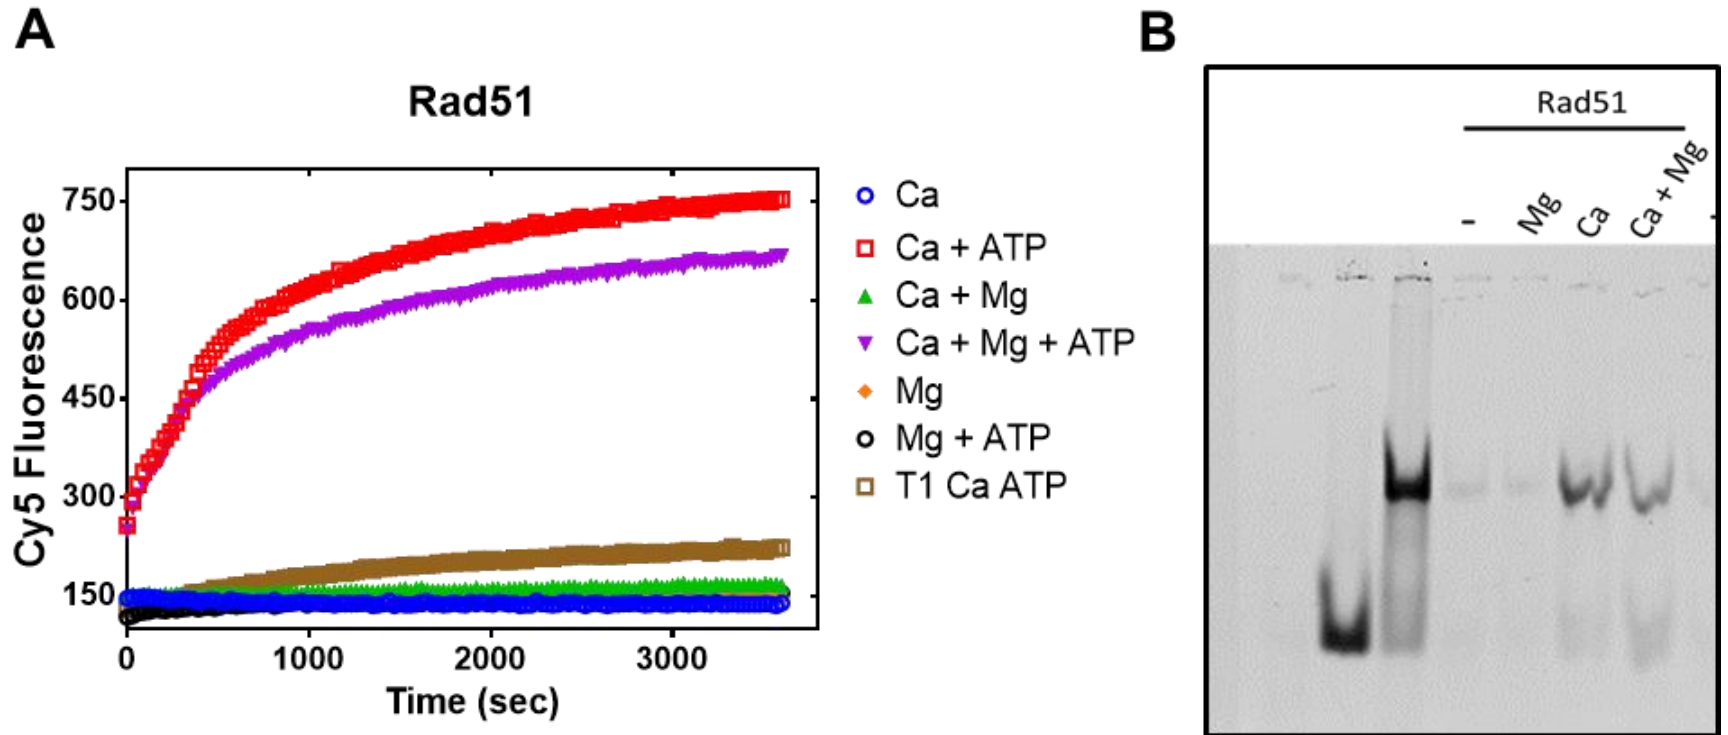

Figure S7

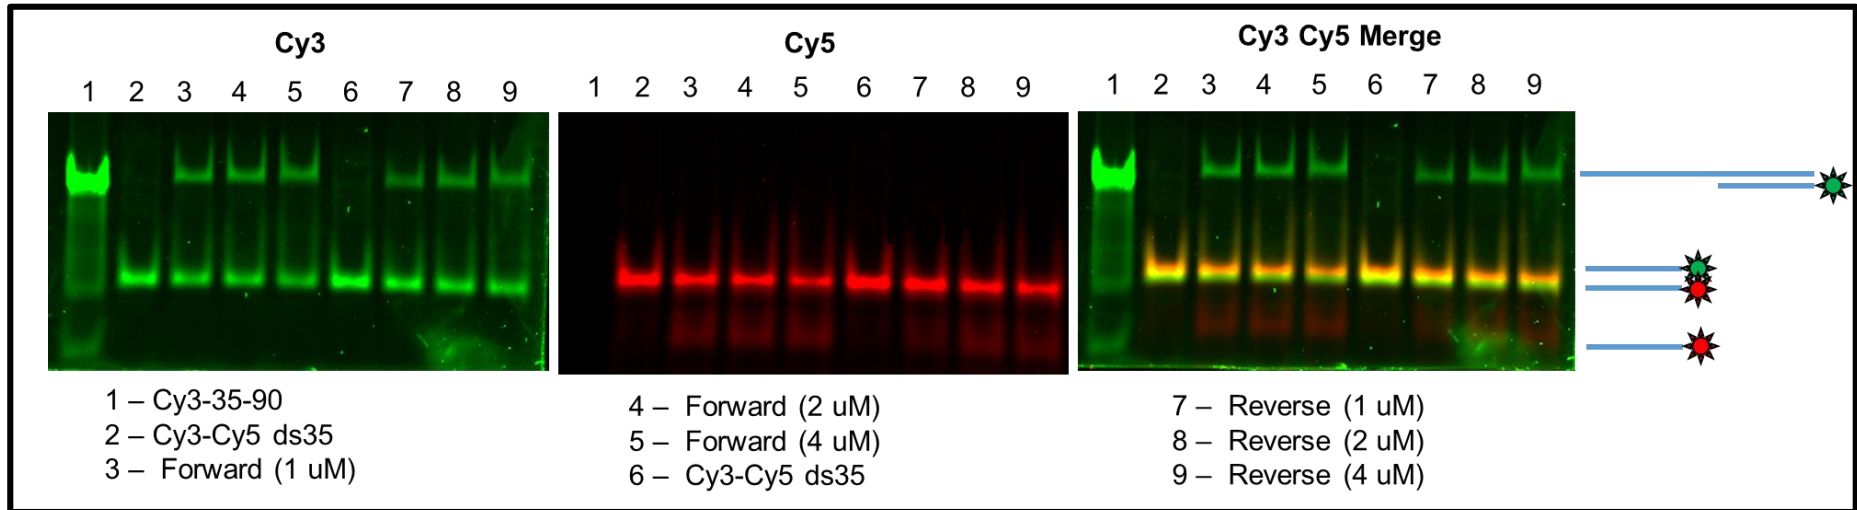

Figure S8

**A**

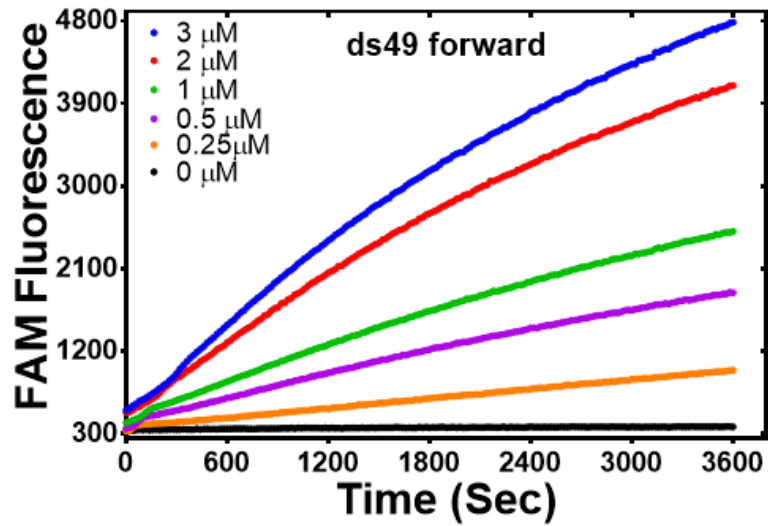

**B**

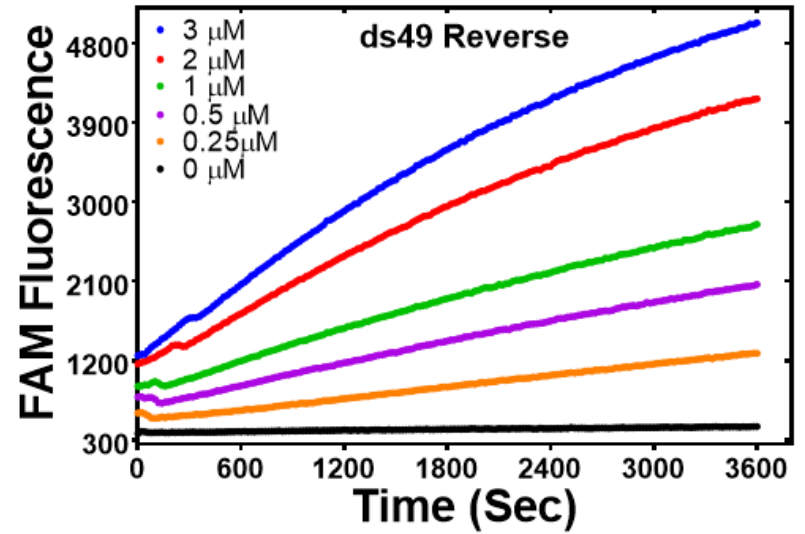

Figure S9

**A**

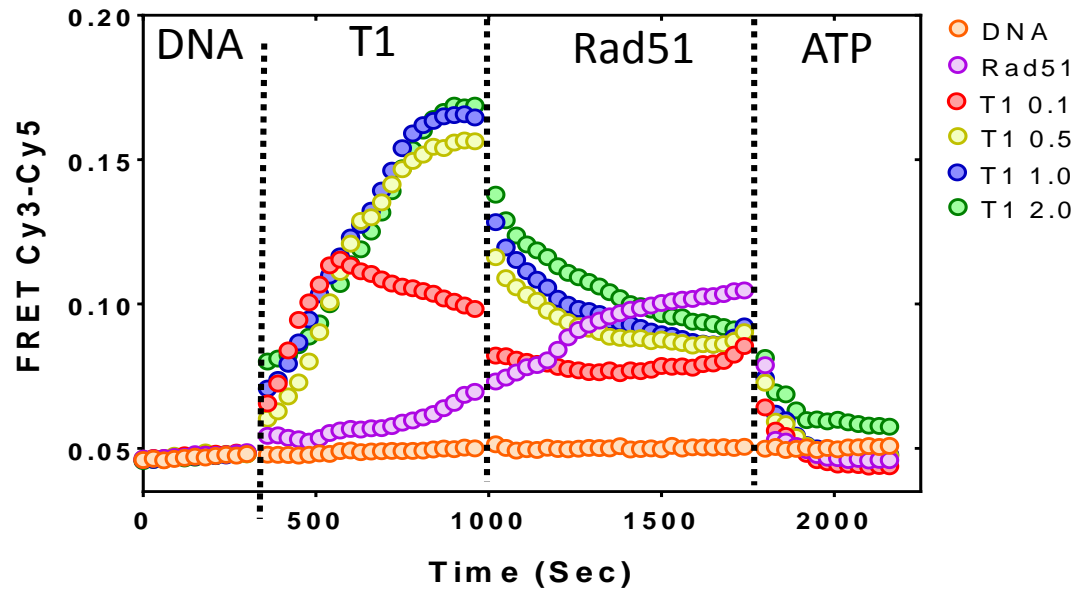

**B**

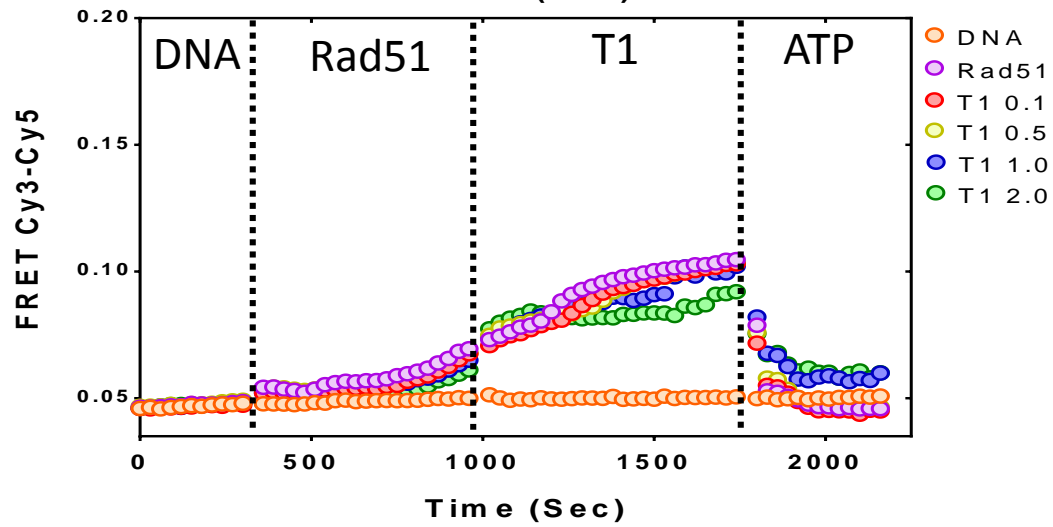

Figure S10

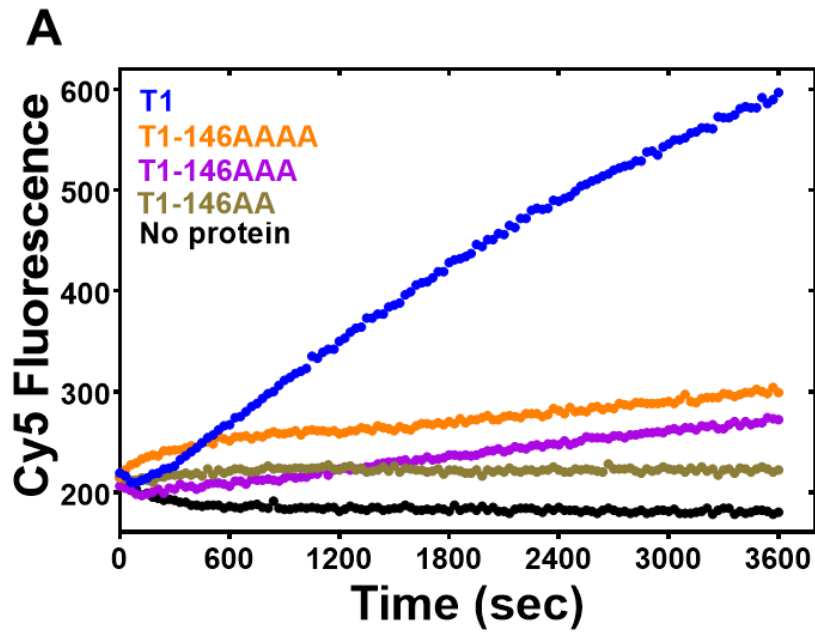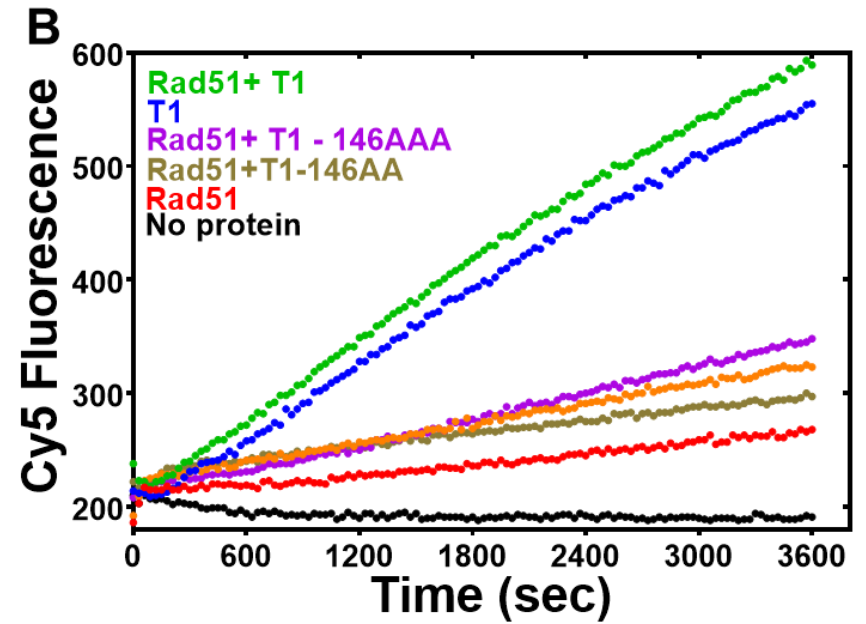

Figure S11

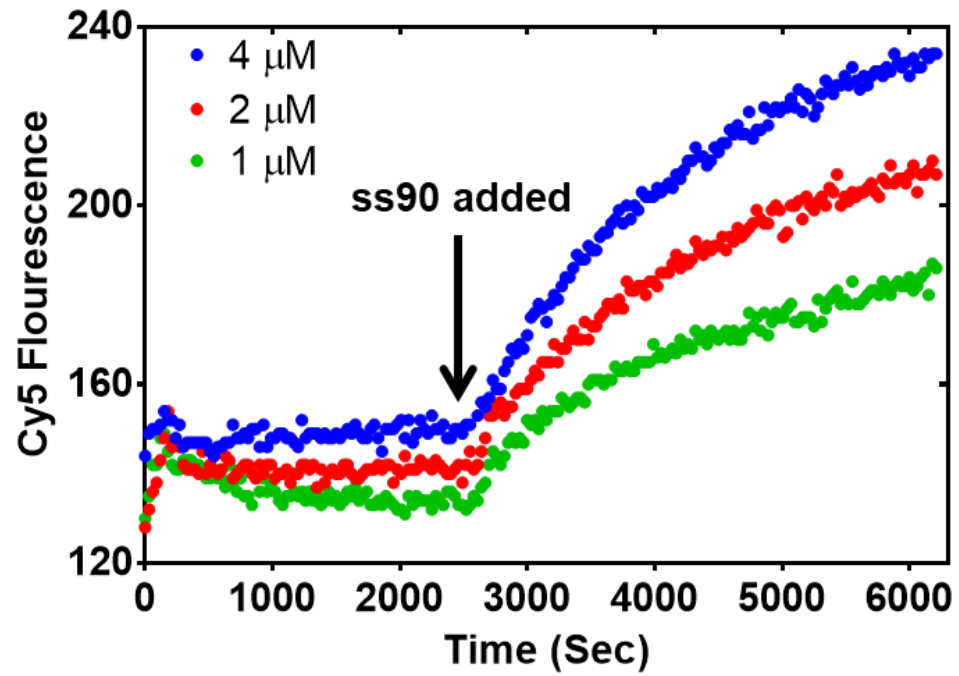

Figure S12

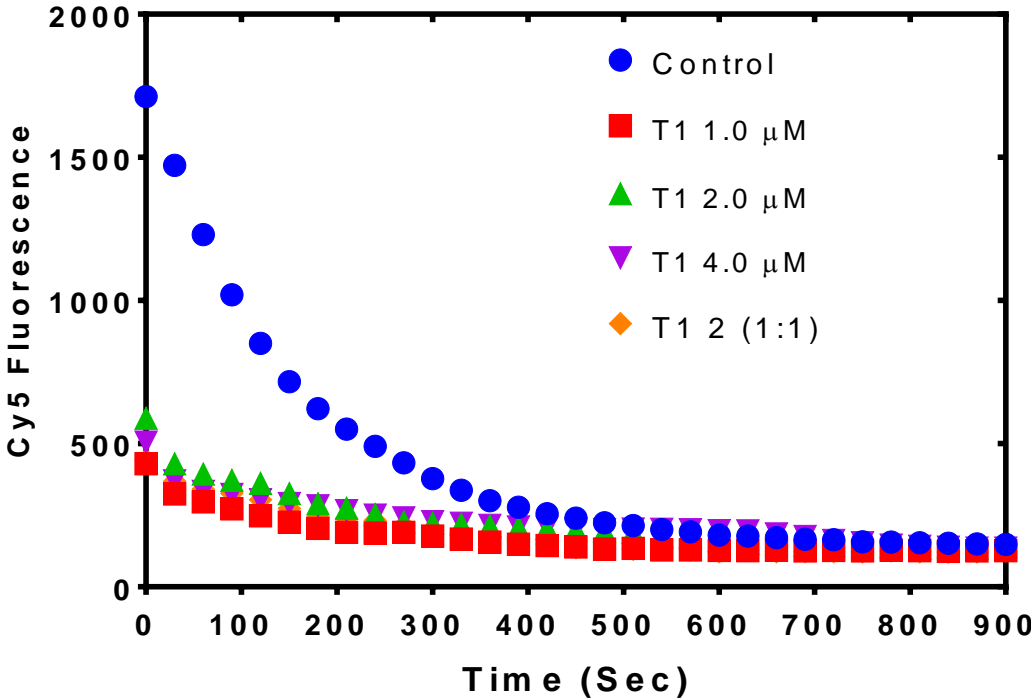

Figure S13

A

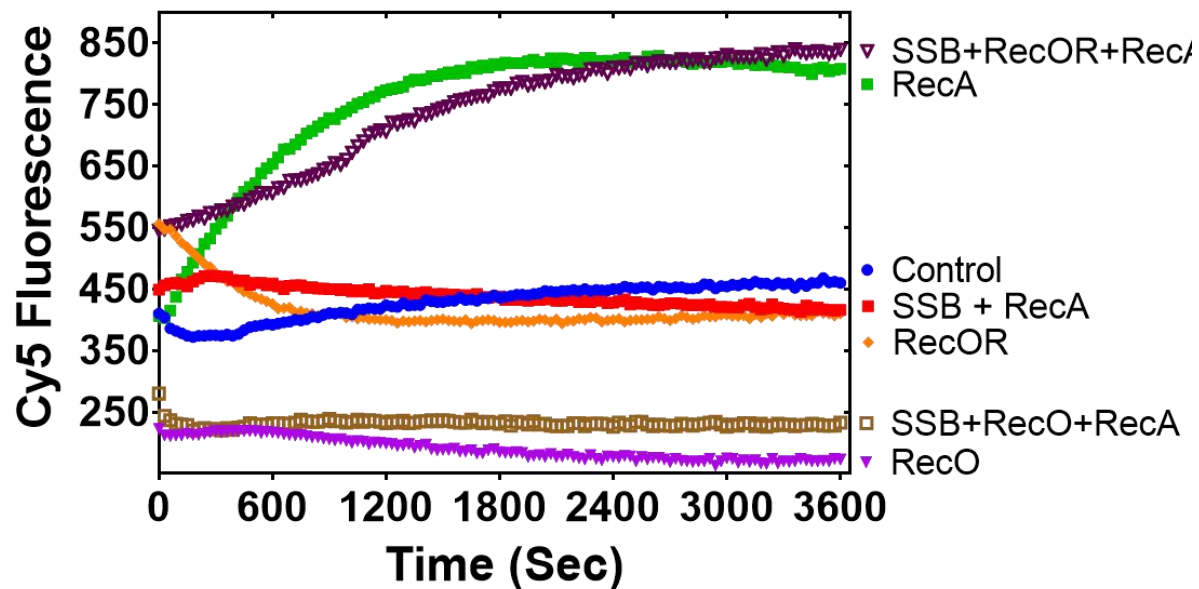

B

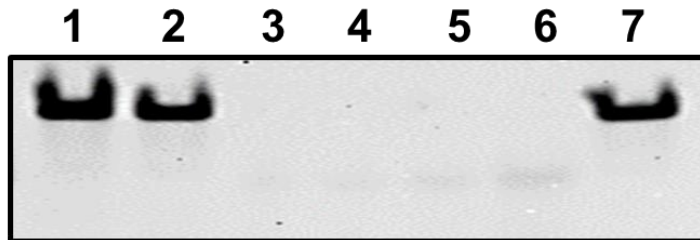

1 – Control      5 – RecOR  
2 – RecA      6 – SSB + RecO + RecA  
3 – RecA + SSB      7 – SSB + RecOR + RecA  
4 – RecO



Figure S14

A)

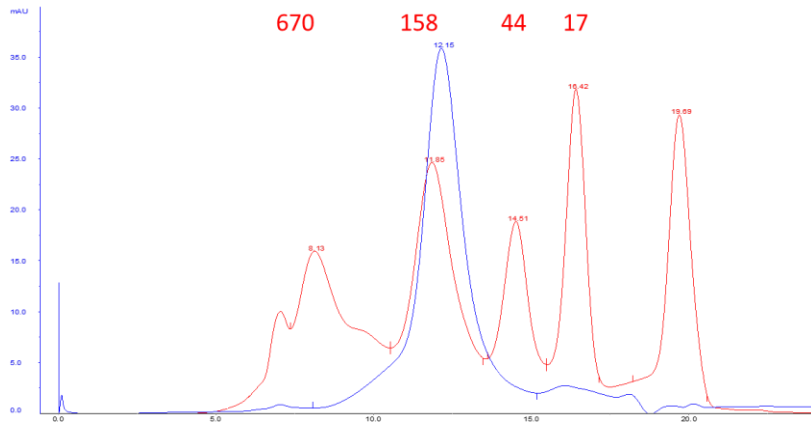

B)

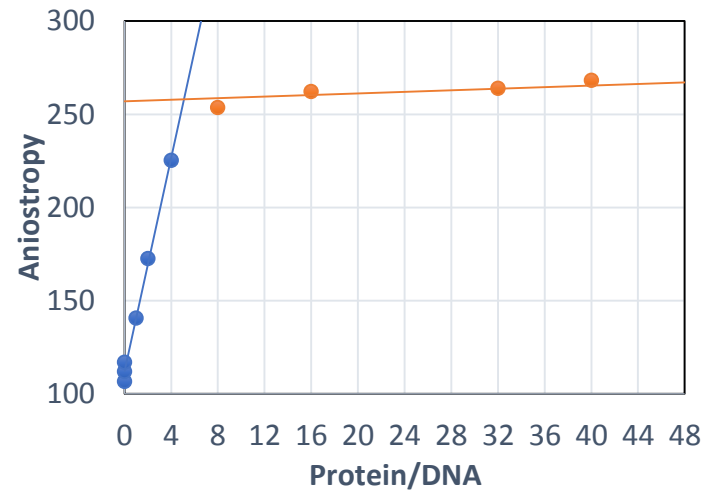

C)

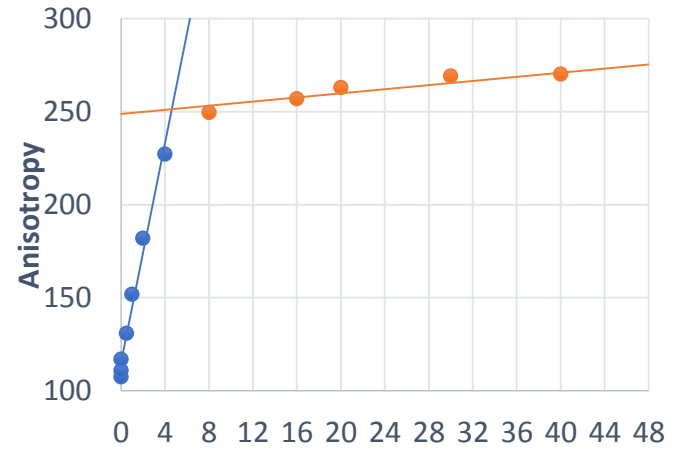

Figure S15

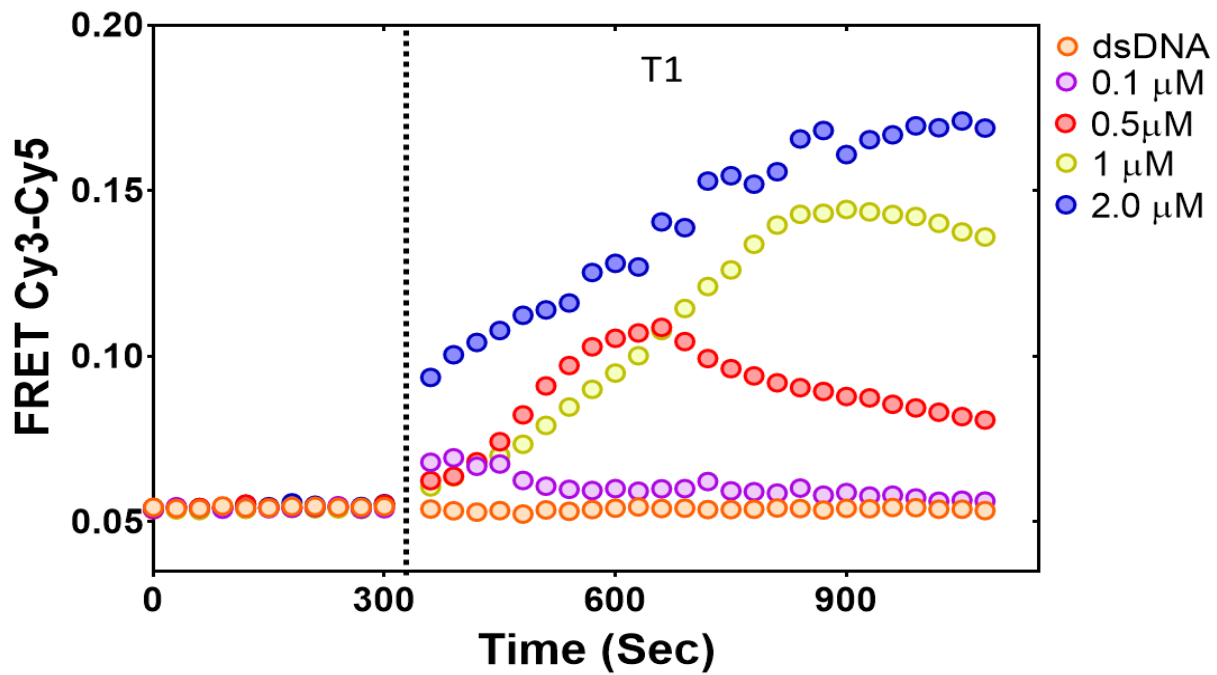

Source: https://www.biorxiv.org/content/10.1101/495192v2.full.pdf
